# Supplementary material
Source: publisher figshare collection journal article supplement (https://gsapubs.figshare.com/ndownloader/files/28281006)
Supplement: Supplementary file 1 [file 28281006]

## Sheet: Sheet1
Supplement 3 - Data Tables: LaMaskin et al. - A crucial geologic test of Late Jurassic exotic collision versus endemic re-accretion in the Klamath Mountains province, U.S.A., with implications for the assembly of western North America
Sample: SALT CREEK; Aliquot: 16KM001; analyzed at CSUN			Isotope Ratios¶						Apparent Ages¶
Analysis	U	U/Th	207Pb	± 1-sigma	238U	± 1-sigma	207Pb	± 1-sigma	207Pb	± 1-sigma	206Pb	± 1-sigma	207Pb	± 1-sigma	Best age†	± 1-sigma	Conc.§
	(ppm)		235U	(%)	206Pb	(%)	206Pb	(%)	235U	(Ma)	238U	(Ma)	206Pb	(Ma)	(Ma)	(Ma)	(%)
X001_7	1653	0.928	0.198	3.86518	41.6667	2.13061	0.064	3.18878	194.97	6.66	152.89	3.15	740.7	66.1	150.05	3.09	0.206413
km001_8	437	0.449	0.321	7.9471	37.594	3.46071	0.085	7.20288	275.4	18.9	169.23	5.65	1315	137	161.75	5.41	0.128692
km001_36	296	1.9	0.1914	1.94592	37.9939	1.89343	0.0521	2.05648	175.76	4.43	167.48	3.07	288.8	46	166.92	3.06	0.579917
X001_21	438.7	1.018	0.2289	1.78315	37.1885	0.928804	0.0638	1.99923	215.5	4.2	171.05	1.54	734.1	41.5	168.01	1.51	0.233006
km001_14	447	1	0.287	2.31103	35.5366	1.47879	0.0702	1.88964	244.49	5.11	178.9	2.57	933.3	38	174.33	2.5	0.191685
km001_46	483	1.046	0.223	2.74549	35.7143	2	0.0581	3.16133	205.4	6.83	178.02	3.45	532.6	67.9	176.15	3.41	0.334247
X001_13	691	1.307	0.352	2.31911	28.5714	1.89286	0.0726	1.7569	304.87	6.66	221.77	4.04	1001.9	34.9	215.73	3.94	0.221349
km001_20	166	0.984	0.315	3.56333	23.4192	3.355	0.0529	2.31473	275.19	9.62	269.55	8.66	323.5	51.6	269.14	8.65	0.83323
km001_40	60.8	1.497	0.499	4.2943	20.202	2.67704	0.0729	4.75911	409.9	18.1	311.45	7.98	1010.3	94.6	303.7	7.79	0.308275
km001_45	247	2.7	0.408	3.12625	20.5339	2.50954	0.0593	2.23698	340.2	9.53	306.54	7.38	577.2	47.6	303.98	7.32	0.531081
km001_58	216	29.3	0.684	2.31233	11.7371	2.75596	0.0582	1.92861	528.8	13.6	527.1	13.7	536.3	41.4	526.9	13.7	0.982845
km001_23	74.3	0.804	0.812	2.51332	10.7643	2.36041	0.0629	1.70338	599.8	12.9	572.7	12.7	703.9	35.5	570.1	12.6	0.81361
km001_44	69.9	0.698	1.036	3.49657	8.489	3.33565	0.0632	2.50258	716.9	21	717.9	22.2	714	52.2	718	22.2	1.00546
km001_25	106	1.299	1.638	2.24266	6.1125	2.74613	0.0716	1.92395	975.8	20.6	976.7	24.4	973.7	38.4	976.9	24.4	1.00308
km001_13	247	1.49	1.69	3.01896	6.0606	4.02398	0.0733	1.87933	996	27.6	984.5	36	1021.3	37.2	983	35.9	0.963967
km001_24	180	2.094	1.796	2.01695	5.6721	1.73603	0.0729	1.46972	1035	14.5	1046.7	16.4	1010.3	29.2	1010.3	14.6	1.03603
km001_15	176	1.077	1.892	1.86068	5.5127	2.33228	0.0758	2.35582	1079.3	21.6	1074.6	22.7	1088.9	46.3	1088.9	23.15	0.986867
X001_11	182	1.78	1.995	2.32725	5.3191	1.81287	0.0775	0.987492	1118.2	13.7	1110.5	18.2	1133.2	19.3	1133.2	19.3	0.979968
X001_9	267	1.406	2.157	1.53747	5.0075	1.57926	0.0787	1.29658	1170.2	13.9	1173.7	16.6	1163.7	25.2	1163.7	25.2	1.00859
km001_27	57.3	1.362	2.283	1.81019	4.9702	2.05305	0.0793	1.54412	1180.7	17.6	1181.8	21.8	1178.7	30	1178.7	30	1.00263
km001_12	164	0.386	2.27	2.92187	4.9261	3.01393	0.0796	2.24336	1189.6	25.8	1191.4	32.1	1186.2	43.5	1186.2	43.5	1.00438
X001_8	212	0.956	2.244	1.79617	4.902	1.65488	0.0802	1.39956	1198.3	14.9	1196.8	17.7	1201	27	1201	27	0.996503
X001_20	178.7	0.657	2.296	1.46661	4.9456	1.66093	0.0811	1.32112	1199.9	14.7	1187.1	17.7	1223	25.4	1223	25.4	0.970646
X001_2	464	8.6	2.069	1.40559	5.2826	1.50668	0.0814	1.12822	1156.5	12.8	1117.6	15.2	1230.2	21.7	1230.2	21.7	0.90847
X001_19	115	0.877	2.451	1.22815	4.7281	1.08988	0.0825	1.2987	1244	11.9	1236.8	12	1256.5	24.9	1256.5	24.9	0.984322
X001_6	439	1.22	2.689	1.61277	4.2974	1.53154	0.0848	1.08298	1333.8	13.7	1348.6	18.3	1310.1	20.6	1310.1	20.6	1.02939
km001_57	226	0.636	2.84	2.33544	4.2194	2.80531	0.0861	2.13326	1358.8	25.8	1371.1	33.9	1339.6	40.4	1339.6	40.4	1.02351
km001_38	207	1.585	2.74	3.1655	4.329	2.87572	0.0872	2.22337	1349.1	26.6	1339.7	34.1	1364.1	42	1364.1	42	0.982113
X001_18	185	2.053	2.803	1.54718	4.4092	1.52742	0.0873	1.63639	1336.3	16.3	1317.7	17.9	1366.3	30.9	1366.3	30.9	0.964429
km001_43	436	1.29	2.65	4.81325	4.902	4.2465	0.0898	2.84078	1279.2	36.4	1196.8	45.5	1420.4	53.2	1420.4	53.2	0.84258
km001_47	186	1.186	3.13	1.95605	3.9526	2.62034	0.0898	1.76128	1440.4	23.8	1453.9	33.5	1420.4	33	1420.4	33	1.02358
X001_15	176	2.178	3.38	1.66043	3.9017	1.52995	0.0936	1.25371	1482.5	15.1	1470.9	19.7	1499.2	23.3	1499.2	23.3	0.981123
km001_39	201	0.93	3.87	4.87792	3.8023	4.26702	0.101	3.23298	1562.9	41.9	1505.2	56.2	1641.7	58.8	1641.7	58.8	0.916854
km001_4	902	28	4.97	2.25845	3.0395	2.33322	0.1072	1.71337	1795.5	23.8	1833.5	36.4	1751.5	30.7	1751.5	30.7	1.04682
km001_6	434	1.8	3.92	2.86339	3.861	2.36536	0.1079	2.12782	1603.6	25.1	1484.7	30.7	1763.4	38.1	1763.4	38.1	0.841953
km001_42	188	0.815	4.94	2.68528	3.0488	2.49345	0.1083	1.8373	1801.5	25.6	1828.7	38.8	1770.2	32.9	1770.2	32.9	1.03305
km001_50	469	1.41	4.42	3.80922	3.4483	3.1663	0.1095	3.30817	1707.9	37.1	1641.5	45	1790.3	59	1790.3	59	0.916885
km001_55	246.7	1.594	4.76	1.5006	3.125	1.9102	0.1102	2.45379	1795.4	25.7	1789.7	29.3	1801.9	43.7	1801.9	43.7	0.993229
km001_51	275	2.19	4.85	2.52472	3.1746	2.42679	0.1105	2.35941	1784.4	27.9	1765.3	36.8	1806.8	42	1806.8	42	0.977031
km001_30	385	1.04	4.7	2.38819	3.2787	2.67652	0.1112	2.43173	1762.6	29.7	1716	39.5	1818.3	43.3	1818.3	43.3	0.943739
km001_3	294	0.718	5.11	2.49611	3.1447	2.72567	0.1139	1.79176	1817.9	27.1	1779.9	41.6	1861.7	31.7	1861.7	31.7	0.956062
km001_34	100	0.753	5.31	3.45901	3.012	2.76106	0.1145	2.80724	1859	32.9	1848.1	43.5	1871.2	49.6	1871.2	49.6	0.987655
km001_32	46.9	0.365	4.53	2.92832	3.6496	2.41849	0.1153	1.94701	1703.7	25.1	1561.1	32.9	1883.8	34.4	1883.8	34.4	0.828697
km001_16	152	1.213	5.87	2.17293	2.7701	2.26545	0.1159	1.80486	1941.4	24.5	1986.9	37.9	1893.1	31.8	1893.1	31.8	1.04955
km001_9	200	0.674	5.87	2.34676	2.907	2.9661	0.1254	2.07499	1967.8	30.8	1905.9	47.9	2033.7	36	2033.7	36	0.937159
km001_33	228	1.53	7.95	3.14465	2.4938	2.92562	0.1391	2.60054	2195.1	34.5	2173.6	53	2215.3	44.2	2215.3	44.2	0.981176
X001_14	562	2.45	9.29	1.26315	2.2831	1.63356	0.1646	1.73581	2428.9	21.5	2341.7	31.4	2502.7	28.6	2502.7	28.6	0.935669
km001_5	131	0.509	12.03	2.12055	1.992	2.54078	0.1713	2.14149	2592.7	30.5	2622.4	53.6	2569.6	35.1	2569.6	35.1	1.02055
km001_29	148.8	0.71	12.75	2.2409	1.992	2.54078	0.1783	1.68828	2630.3	28.1	2622.4	53.6	2636.4	27.5	2636.4	27.5	0.99469
km001_54	170	0.848	21.75	2.32231	1.5456	2.2843	0.2395	1.51037	3154.9	26	3216.5	56.7	3115.9	23.6	3115.9	23.6	1.03229
¶ Data not corrected for common-Pb.
† 206Pb/238U ages common lead corrected by inferring the initial Pb-composition from the Stacey and Kramers (1975) two stage isotope evolution model (Vermeesch, 2018a). Analyses with greater than 10% uncertainty in 207/206 age (1-sigma) or 5% uncertainty in 206/238 age (1-sigma) are excluded. Ages >600 Ma with >20% discordance and/or 5% reverse discordance are excluded. Accepted ages calculated u…
§ Calculated based on 206Pb/238U age vs. 207Pb/206Pb age.
Sample: SALT CREEK; Aliquot: TLKM003; analyzed at USC			Isotope Ratios¶						Apparent Ages¶
Analysis	U	U/Th	207Pb	± 1-sigma	238U	± 1-sigma	207Pb	± 1-sigma	207Pb	± 1-sigma	206Pb	± 1-sigma	207Pb	± 1-sigma	Best age†	± 1-sigma	Conc.§
	(ppm)		235U	(%)	206Pb	(%)	206Pb	(%)	235U	(Ma)	238U	(Ma)	206Pb	(Ma)	(Ma)	(Ma)	(%)
KM003_26	7170	1.541	0.2536	2.41421	41.4079	1.94617	0.0763	2.07291	229.4	5.53821	153.9	1.52814	1099	22.7813	148.62	1.4	0.140036
KM003_40	526	1.5	0.1772	2.36099	37.793	2.1	0.0485	2.19388	166	3.91924	168.3	1.80321	116	2.5449	168.55	1.75	1.45086
KM003_110	792	1.268	0.1835	2.11311	37.3552	1.27008	0.0497	1.95048	171	3.61341	170.3	1.10354	175	3.41334	170.26	1.09	0.973143
KM003_82	377	1.749	0.1929	2.90941	37.0233	1.55498	0.0508	2.61128	178.9	5.20493	171.8	1.36299	213	5.56203	171.54	1.35	0.806573
KM003_93	390	2.684	0.1866	2.18737	36.6569	1.50293	0.0496	1.95441	173.7	3.79946	173.5	1.3304	173	3.38113	173.49	1.28	1.00289
KM003_112	2870	0.8	0.1883	1.93878	35.765	1.1	0.0493	1.73469	175	3.39286	177.8	0.997857	157	2.72347	177.85	0.96	1.13248
KM003_116	630	2.41	0.1921	2.65593	35.6379	1.63934	0.05	2.44898	178.2	4.73287	178.4	1.49214	183	4.48163	178.32	1.41	0.974863
KM003_3	446	2.1	0.1903	0.180879	35.323	1.1	0.0484	2.09184	177	0.320156	179.9	1.00964	114	2.38469	180.25	0.98	1.57807
KM003_66	266	1.928	0.268	3.80749	34.3407	1.99176	0.0673	3.41147	241	9.17606	185	1.87998	820	27.974	181.02	1.78	0.22561
KM003_7	34.3	1.421	0.193	5.8158	34.3289	2.57467	0.0475	5.80021	177	10.294	185.1	2.43148	70	4.06015	185.63	2.38	2.64429
KM003_59	308	1.937	0.1974	2.4037	34.06	1.66894	0.0485	2.31433	182.8	4.39396	186.6	1.5889	118	2.73091	186.85	1.57	1.58136
KM003_50	1246	5.32	0.2133	1.91356	32.6371	1.53394	0.05043	1.82107	196.3	3.75633	194.6	1.52299	210	3.82425	194.46	1.44	0.926667
KM003_78	310	2.18	0.2354	2.81761	31.9795	2.52638	0.0544	2.71984	214.3	6.03814	198.5	2.55861	340	9.24745	197.43	2.43	0.583824
KM003_13	790	3.235	0.2709	2.0717	26.1575	1.56945	0.0517	1.97371	243.3	5.04045	241.9	1.93699	266	5.25007	241.66	1.9	0.909398
KM003_134	818	2.1	0.2757	2.04082	25.654	1.6	0.0513	1.9898	247	5.04082	246.5	2.01224	257	5.11378	246.46	1.93	0.959144
KM003_46	452	1.597	0.2881	2.12511	24.9439	1.29708	0.0516	1.97754	257	5.46154	253.4	1.67694	258	5.10204	253.3	1.61	0.982171
KM003_44	483	2.275	0.2936	2.0853	24.426	1.36786	0.05137	1.88707	261.3	5.4489	258.7	1.80543	252	4.75542	258.66	1.77	1.02659
KM003_24	275	1.8	0.3058	2.34694	24.149	1.4	0.0533	2.29592	271	6.3602	261.6	1.86857	339	7.78316	260.98	1.79	0.771681
KM003_132	253	2.128	0.304	2.85311	23.753	1.40143	0.0527	2.80757	269.4	7.68629	265.9	1.90122	264	7.412	265.47	1.82	1.0072
KM003_111	2144	3.3	0.415	2.19388	18.553	2.2	0.0557	1.9898	354	7.76633	338.5	3.79949	435	8.65561	337.41	3.62	0.778161
KM003_77	205	1.82	0.455	2.80332	17.2117	2.0654	0.0567	2.69949	374.9	10.5096	364	3.83575	431	11.6348	362.79	3.7	0.844548
KM003_49	1424	3.388	0.4454	1.94734	16.7898	1.67898	0.0538	1.707	373.9	7.28112	372.9	3.19434	359	6.12814	373.07	3.08	1.03872
KM003_28	204	2.68	0.564	2.17108	13.7438	1.51182	0.057	1.96921	455.6	9.89145	452.7	3.49184	484	9.53097	452.23	3.28	0.935331
KM003_1	108.6	1.963	0.736	2.49556	11.2233	1.45904	0.0595	2.40096	559	13.9502	550.1	4.09498	580	13.9256	549.62	3.95	0.948448
KM003_6	412	10.3	0.767	1.99558	10.5764	1.26917	0.059	1.81598	579.1	11.5564	582.4	3.77125	576	10.46	582.72	3.62	1.01111
KM003_8	62.6	1.574	1.439	2.3046	6.55308	1.7038	0.0688	2.15057	904	20.8336	915	7.95397	891	19.1616	916.38	7.26	1.02694
KM003_14	97.7	3.28	1.657	2.30931	5.9453	1.54578	0.0712	1.93476	994	22.9546	1002	7.9024	957	18.5157	957	18.5157	1.04702
KM003_36	133	1.479	1.711	2.0277	5.81734	1.27981	0.0721	1.83985	1012	20.5203	1023	6.67984	985	18.1225	985	18.1225	1.03858
KM003_119	1195	8.61	1.805	1.97863	5.68828	1.13766	0.0744	1.78297	1047	20.7163	1045	6.06557	1049	18.7034	1049	18.7034	0.996187
KM003_22	106	1.714	1.988	2.02747	5.24109	1.31027	0.0756	1.75467	1111	22.5252	1126	7.52738	1081	18.968	1081	18.968	1.04163
KM003_18	77.9	2.671	1.873	2.12472	5.56793	1.50334	0.0762	1.94172	1070	22.7345	1065	8.16866	1109	21.5337	1109	21.5337	0.960325
KM003_105	144	1.8	1.998	2.09184	5.252	2.3	0.0771	1.83673	1114	23.3031	1123	13.1781	1124	20.6449	1124	20.6449	0.99911
KM003_138	221	2.717	1.972	1.88869	5.42594	1.13945	0.0774	1.71386	1105.5	20.8794	1091	6.34253	1128	19.3324	1128	19.3324	0.967199
KM003_65	229	2.642	1.967	2.8532	5.50964	1.81818	0.081	3.14941	1101	31.4137	1075	9.97217	1167	36.7536	1167	36.7536	0.921165
KM003_5	61.7	1.682	2.217	2.00215	5.08388	1.27097	0.0814	1.94304	1186	23.7455	1158	7.5091	1226	23.8216	1226	23.8216	0.944535
KM003_124	54.1	0.838	2.504	2.24131	4.57666	1.69336	0.0839	2.12838	1271	28.4871	1276	11.0241	1281	27.2646	1281	27.2646	0.996097
KM003_107	69.4	2.7	2.688	2.2777	4.31779	1.98618	0.0842	1.99961	1323	30.1339	1343	13.6094	1300	25.995	1300	25.995	1.03308
KM003_48	96	2.07	2.9	1.93526	4.13907	1.49007	0.0864	1.88964	1381	26.7259	1395	10.6053	1349	25.4913	1349	25.4913	1.0341
KM003_20	431	1.7	2.393	1.93878	5.118	1.7	0.0898	1.68367	1245	24.1378	1150	9.97449	1420	23.9082	1420	23.9082	0.809859
KM003_97	182.1	2.545	3.246	1.88615	3.81825	1.33639	0.0907	1.68755	1468	27.6887	1500	10.2275	1448	24.4358	1448	24.4358	1.03591
KM003_122	41.8	1.015	2.97	2.74857	4.25713	1.70285	0.0915	2.73224	1396	38.3701	1360	11.8157	1455	39.7541	1455	39.7541	0.934708
KM003_128	455	2.1	3.389	1.95711	3.87447	2.13096	0.09569	1.70619	1504	29.435	1480	16.0909	1540	26.2753	1540	26.2753	0.961039
KM003_45	80.6	1.827	3.694	2.07175	3.72439	1.71322	0.098	1.82216	1572	32.568	1533	13.3998	1582	28.8265	1582	28.8265	0.969027
KM003_118	527	3.361	3.992	1.78929	3.45185	1.3117	0.09996	1.68435	1633.7	29.2317	1640	10.9755	1622	27.3201	1622	27.3201	1.0111
KM003_2	99.1	1.069	4.082	1.87483	3.42231	1.06092	0.1013	1.7628	1650	30.9347	1652	8.94202	1651	29.1038	1651	29.1038	1.00061
KM003_109	361	16.6	4.286	1.7856	3.32336	1.36258	0.1043	1.71209	1692	30.2123	1695	11.7835	1701	29.1227	1701	29.1227	0.996473
KM003_23	172	1.5	3.44	2.09184	4.16	2	0.1046	1.78571	1517	31.7332	1389	14.1735	1705	30.4464	1705	30.4464	0.814663
KM003_129	335	2.31	4.083	1.87437	3.52485	1.72718	0.1048	1.70393	1650	30.9271	1610	14.1875	1713	29.1882	1713	29.1882	0.939872
KM003_75	182	2.5	4.34	1.88776	3.388	1.3	0.1067	1.78571	1700	32.0918	1667	11.0566	1745	31.1607	1745	31.1607	0.955301
KM003_117	180	2.01	4.51	2.14942	3.31126	1.45695	0.1072	1.80856	1732	37.2279	1701	12.6443	1749	31.6317	1749	31.6317	0.972556
KM003_81	172	2	4.77	2.04082	3.108	2.1	0.1074	1.78571	1778	36.2857	1797	19.2536	1752	31.2857	1752	31.2857	1.02568
KM003_79	136.5	1.324	4.56	1.90208	3.21337	1.63882	0.1071	1.81025	1741	33.1152	1746	14.5989	1753	31.7336	1753	31.7336	0.996007
KM003_27	164.8	1.656	4.675	1.85529	3.16857	1.3308	0.1075	1.75605	1762	32.6902	1768	12.0043	1755	30.8187	1755	30.8187	1.00741
KM003_16	218	1.498	4.832	1.90059	3.07409	1.3526	0.1082	1.69754	1790	34.0206	1815	12.5253	1768	30.0124	1768	30.0124	1.02658
KM003_4	38.6	1.024	4.91	2.07822	3.08261	1.418	0.1085	1.92796	1802	37.4496	1811	13.1021	1769	34.1056	1769	34.1056	1.02374
KM003_113	402	3.78	4.852	1.89276	3.0525	1.49573	0.10832	1.69566	1795	33.975	1826	13.9347	1770	30.0131	1770	30.0131	1.03164
KM003_58	186	2.409	4.989	1.84078	3.0175	1.17683	0.1084	1.74147	1817	33.4471	1845	11.0778	1774	30.8937	1774	30.8937	1.04002
KM003_115	61.5	1.289	4.34	2.11605	3.43053	2.29846	0.1082	1.839	1699	35.9518	1649	19.3375	1775	32.6422	1775	32.6422	0.929014
KM003_71	218	1.824	4.822	1.79873	3.09693	1.5175	0.1084	1.74147	1790	32.1972	1804	13.9672	1775	30.9111	1775	30.9111	1.01634
KM003_131	148	1.801	4.32	2.12585	3.50385	2.17239	0.1088	1.82886	1695	36.0332	1618	17.9333	1776	32.4805	1776	32.4805	0.911036
KM003_62	194.6	2.13	4.9	1.87422	3.06185	1.1635	0.1088	1.68818	1802	33.7734	1822	10.8158	1777	29.9989	1777	29.9989	1.02532
KM003_101	288	2.15	4.68	1.85331	3.19081	1.94639	0.109	1.73189	1763	32.6738	1762	17.4977	1784	30.8968	1784	30.8968	0.987668
KM003_21	43.9	2.441	4.89	2.2954	3.08547	1.91299	0.1097	2.09291	1797	41.2483	1809	17.6561	1787	37.4002	1787	37.4002	1.01231
KM003_54	102.6	3.525	4.44	2.06839	3.45662	2.07397	0.1096	2.00171	1719	35.5557	1638	17.3325	1788	35.7906	1788	35.7906	0.916107
KM003_19	145	1.998	4.33	1.88528	3.43525	1.40845	0.1095	1.72398	1698	32.0121	1647	11.8353	1788	30.8247	1788	30.8247	0.921141
KM003_29	412	2.879	4.875	1.77917	3.09215	1.14409	0.10961	1.6757	1797.6	31.9824	1806	10.542	1791	30.0118	1791	30.0118	1.00838
KM003_126	55.6	0.601	4.961	1.95402	3.06185	1.6534	0.1111	1.92876	1812	35.4068	1821	15.3614	1813	34.9685	1813	34.9685	1.00441
KM003_91	449	2.91	4.85	3.68189	3.16356	2.78393	0.112	2.82434	1788	65.8321	1770	25.1406	1823	51.4878	1823	51.4878	0.970927
KM003_139	133	3.18	5.101	1.90039	3.06654	1.74793	0.112	1.6855	1836	34.8911	1819	16.2219	1830	30.8446	1830	30.8446	0.993989
KM003_70	177.9	1.13	5.098	2.00159	3.07882	1.63177	0.1124	1.81567	1835	36.7291	1813	15.0939	1836	33.3358	1836	33.3358	0.987473
KM003_74	191	2.451	5.241	1.84962	2.97	1.5741	0.1124	1.6795	1859	34.3845	1870	15.0182	1837	30.8524	1837	30.8524	1.01796
KM003_87	193.9	1.535	5.429	1.78557	2.88018	1.23848	0.1135	1.66322	1889.1	33.7313	1921	12.1384	1855	30.8527	1855	30.8527	1.03558
KM003_95	227	5.6	5.25	3.40136	3.01568	1.68878	0.1145	2.76268	1851	62.9592	1846	15.9056	1856	51.2753	1856	51.2753	0.994612
KM003_125	94.6	1.251	5.342	2.00567	2.89687	1.59328	0.1137	1.75004	1875	37.6063	1911	15.5345	1857	32.4982	1857	32.4982	1.02908
KM003_104	229	1.606	5.424	1.88128	2.85388	1.42694	0.1138	1.7485	1888	35.5186	1936	14.0947	1858	32.4872	1858	32.4872	1.04198
KM003_9	170	2.171	5.418	1.88337	2.86205	1.08758	0.11413	1.69874	1887.4	35.5467	1932	10.7204	1865	31.6816	1865	31.6816	1.03592
KM003_96	248.8	1.82	5.34	2.10196	2.94811	2.91863	0.115	1.86335	1874	39.3908	1882	28.0248	1878	34.9938	1878	34.9938	1.00213
KM003_100	66.31	0.589	5.498	1.94876	2.88267	1.72961	0.1161	1.8457	1899	37.007	1919	16.9342	1893	34.9391	1893	34.9391	1.01373
KM003_11	842	3.345	4.717	1.83877	3.4662	1.38648	0.11962	1.66343	1770	32.5462	1634	11.5587	1949	32.4203	1949	32.4203	0.838379
KM003_130	398	1.533	4.969	1.95087	3.29489	1.87809	0.11969	1.66246	1813	35.3693	1708	16.3662	1950	32.4179	1950	32.4179	0.875897
KM003_34	81.9	1.622	6.271	1.87126	2.70563	1.35281	0.1211	1.68523	2014	37.6872	2027	13.9906	1970	33.1991	1970	33.1991	1.02893
KM003_56	160.3	3.388	5.55	2.02243	3.0248	1.72414	0.1212	1.81013	1909	38.6082	1841	16.1946	1971	35.6777	1971	35.6777	0.934044
KM003_64	227	1.83	6.129	1.83137	2.76855	1.43965	0.1228	1.6619	1995.6	36.5469	1988	14.6021	2001	33.2547	2001	33.2547	0.993503
KM003_32	209	2.254	6.63	2.15471	2.67023	1.81575	0.1271	1.76625	2061	44.4085	2050	18.9913	2056	36.314	2056	36.314	0.997082
KM003_88	227	2.74	6.84	2.08855	2.74574	2.66337	0.1374	1.78237	2090	43.6508	2001	27.1909	2201	39.23	2201	39.23	0.909132
KM003_84	399	1.804	8.63	1.83271	2.3015	1.28884	0.1431	1.67572	2300	42.1524	2326	15.2951	2263	37.9216	2263	37.9216	1.02784
KM003_86	257	2.76	7.67	1.86254	2.65111	1.40509	0.1473	1.69722	2192	40.827	2063	14.7893	2314	39.2736	2314	39.2736	0.89153
KM003_89	305	1.241	8.13	1.88267	2.54	1.3462	0.1491	1.71095	2244	42.2472	2140	14.6983	2333	39.9164	2333	39.9164	0.917274
KM003_12	197	2.104	10.7	1.9073	2.10615	1.32687	0.1649	1.73265	2496	47.6063	2504	16.9515	2505	43.4029	2505	43.4029	0.999601
KM003_43	54.8	0.725	10.35	2.07039	2.22965	1.53846	0.1657	1.81666	2465	51.0352	2388	18.7441	2512	45.6345	2512	45.6345	0.950637
KM003_35	504	1.167	8.93	3.59942	2.65252	5.03979	0.1703	1.73763	2316	83.3627	2058	52.9178	2559	44.4659	2559	44.4659	0.80422
KM003_72	151	1.542	9.15	2.45344	2.61097	3.13316	0.1738	1.90813	2351	57.6804	2091	33.4257	2592	49.4587	2592	49.4587	0.806713
KM003_69	177.1	2.56	11.11	1.88284	2.19491	1.64618	0.1753	1.71717	2532	47.6735	2420	20.3253	2607	44.7667	2607	44.7667	0.92827
KM003_57	77.2	1.529	12.52	1.87455	1.93874	1.55099	0.1766	1.70453	2644	49.5631	2681	21.2153	2620	44.6587	2620	44.6587	1.02328
KM003_61	243	2.87	12.19	2.05086	2.05761	2.6749	0.1815	1.77096	2617	53.671	2553	34.8419	2664	47.1783	2664	47.1783	0.958333
KM003_53	75.1	1.505	11.78	2.03562	2.1322	2.77186	0.1818	1.7961	2587	52.6615	2492	35.2422	2667	47.9019	2667	47.9019	0.934383
KM003_80	165	1.25	13.59	1.80205	1.8406	1.17799	0.1825	1.67738	2721	49.0337	2797	16.8103	2674	44.8532	2674	44.8532	1.046
KM003_123	166	2.029	11.84	2.0253	2.12044	2.01442	0.1833	1.67006	2591	52.4756	2490	25.5913	2682	44.7911	2682	44.7911	0.928412
KM003_94	133	1.8	13.49	1.83673	1.891	1.4	0.1845	1.78571	2716	49.8857	2736	19.5429	2691	48.0536	2691	48.0536	1.01672
KM003_42	128	2.97	13.37	1.98434	1.95046	1.87244	0.1884	1.7061	2708	53.7359	2667	25.4786	2727	46.5253	2727	46.5253	0.977998
KM003_38	71.7	1.963	18.31	1.83908	1.67364	1.42259	0.2195	1.69681	3008	55.3194	3019	21.9123	2975	50.48	2975	50.48	1.01479
KM003_17	274	1.083	14.55	1.92861	2.10881	1.26529	0.2238	1.7098	2788	53.7695	2502	16.1518	3006	51.3966	3006	51.3966	0.832335
¶ Data not corrected for common-Pb.
† 206Pb/238U ages common lead corrected by inferring the initial Pb-composition from the Stacey and Kramers (1975) two stage isotope evolution model (Vermeesch, 2018a). Analyses with greater than 10% uncertainty in 207/206 age (1-sigma) or 5% uncertainty in 206/238 age (1-sigma) are excluded. Ages >600 Ma with >20% discordance and/or 5% reverse discordance are excluded. Accepted ages calculated u…
§ Calculated based on 206Pb/238U age vs. 207Pb/206Pb age.
Decay constants: 235U = 9.8485E-10/yr, 238U = 1.55125E-10/yr; 238U/235U = 137.818
Uncertainties quoted without components related to systematic error unless otherwise stated. Total systematic uncertainties (sys): 206Pb/238U = 4.1%; 207Pb/206Pb = 2.1%
Systematic uncertainties include excess variance determined from long-term repeated analyses of Plesovice (206Pb/238U = 4.1%, 207Pb/206Pb = 2.1%); decay constant uncertainties (238U: 0.11%, 235U: 0.012%); and 91500 reference value uncertainties (Wiedenbeck et al., 1995).
Sample: DUBAKELLA W; Aliquot: TLKM002; analyzed at USC			Isotope Ratios¶						Apparent Ages¶
Analysis	U	U/Th	207Pb	± 1-sigma	238U	± 1-sigma	207Pb	± 1-sigma	207Pb	± 1-sigma	206Pb	± 1-sigma	207Pb	± 1-sigma	Best age†	± 1-sigma	Conc.§
	(ppm)		235U	(%)	206Pb	(%)	206Pb	(%)	235U	(Ma)	238U	(Ma)	206Pb	(Ma)	(Ma)	(Ma)	(%)
KM002_57	756	4.56	0.1734	1.53002	40.1929	0.984316	0.0503	2.38569	162.3	2.48323	158.4	3.05595	203	2.47089	158.2	1.5	0.780296
KM002_1	764	3.84	0.1704	1.43719	39.1083	0.857989	0.0492	2.03252	160.3	2.30382	162.8	2.73774	155	1.60735	162.8	1.4	1.05032
KM002_71	770	4.91	0.1814	1.88444	39.0168	1.19439	0.0519	3.85356	169.2	3.18847	163.1	3.81818	265	5.21018	162.6	1.8	0.615472
KM002_123	200	3.95	0.1864	2.24446	37.4672	1.22342	0.05	4	173.4	3.89189	169.8	4.07164	200	4.08163	169.7	2	0.849
KM002_77	691	1.74	0.1898	1.72039	36.7107	1.3111	0.0511	2.15264	176.3	3.03305	173.2	4.45081	236	2.59196	172.9	2.2	0.733898
KM002_139	3860	0.704	0.1964	0.987157	35.524	1.06934	0.05065	1.71767	182.1	1.79761	178.9	3.74959	222	1.94552	178.7	1.9	0.805856
KM002_8	536	1.933	0.2647	1.75401	31.2891	1.1494	0.0601	2.82862	239.6	4.2026	202.8	4.56871	615	8.87551	200.3	2.3	0.329756
KM002_111	349	1.217	0.2367	1.37951	28.6862	0.892784	0.0494	2.42915	215.6	2.97423	220.9	3.86543	170	2.10692	221.2	1.8	1.29941
KM002_17	242	1.762	0.2967	1.7196	23.6407	1.0976	0.0495	3.43434	263.6	4.53285	267.1	5.74612	173	3.03133	267.8	2.9	1.54393
KM002_129	189	2.055	0.326	2.66057	22.9043	1.28544	0.0548	5.29197	286	7.60924	275.5	6.94114	380	10.2599	274.5	3.4	0.725
KM002_89	19.3	2.725	0.332	4.4566	22.3714	1.36968	0.0534	8.8015	289	12.8796	282	7.57047	280	12.5736	281.4	3.7	1.00714
KM002_56	114.6	3.27	0.32	1.75383	22.1435	0.971602	0.0513	3.31384	281.4	4.93527	284.7	5.42166	274	4.63261	285	2.6	1.03905
KM002_63	490	2.887	0.3203	1.56104	21.8675	0.836766	0.0509	2.35756	282	4.40212	288.2	4.72666	241	2.89884	288.7	2.3	1.19585
KM002_133	70.1	3.099	0.335	2.5891	21.0881	1.07593	0.0506	4.94071	292	7.56016	298.7	6.29903	200	5.04154	299.3	3.1	1.4935
KM002_54	2510	2.691	0.3636	1.54352	20.7039	1.90138	0.05438	1.15851	314.7	4.85746	304.1	11.3329	385	2.27565	303.3	5.5	0.78987
KM002_40	1060	1.464	0.403	1.64582	19.3125	0.98533	0.056	2.14286	343.3	5.6501	325.4	6.28428	446	4.87609	324.2	3	0.729596
KM002_34	1910	2.6	0.3983	1.24253	19.1902	1.17491	0.05499	1.45481	340.3	4.22831	327.4	7.53944	408	3.02838	326.7	3.7	0.802451
KM002_85	970	5.343	0.3716	1.11212	18.9717	0.871151	0.05118	1.32864	320.8	3.56769	331.1	5.65339	245	1.66081	331.9	2.7	1.35143
KM002_39	554	2.61	0.4329	1.29643	18.1356	1.01782	0.0564	2.12766	365.1	4.73327	346	6.90243	463	5.02605	344.7	3.4	0.7473
KM002_88	733	3.569	0.4231	1.04911	17.5994	0.987723	0.05378	1.19003	358.2	3.7579	356.3	6.89775	359	2.1797	356.2	3.3	0.992479
KM002_20	1480	3.22	0.414	1.72533	17.5439	1.25313	0.05223	1.41681	352	6.07315	357.1	8.77088	293	2.11799	358	4.4	1.21877
KM002_61	1080	7.05	0.4395	1.07961	17.2147	0.878299	0.05477	1.05897	369.8	3.99241	364	6.26614	400	2.16117	363.6	3	0.91
KM002_35	991	2.47	0.428	1.19207	17.1204	0.873487	0.05268	1.57555	361.7	4.3117	365.9	6.26434	312	2.50802	366.5	3	1.17276
KM002_31	688	2.181	0.4827	1.16268	17.0911	0.871994	0.0593	1.50084	399.9	4.64955	366.5	6.26389	574	4.39533	364.2	3	0.638502
KM002_28	1231	2.96	0.4331	1.03666	17.0068	0.954464	0.05503	1.05397	365.3	3.78694	368.3	6.88997	411	2.21011	367.9	3.4	0.896107
KM002_125	1338	3.72	0.4543	1.02198	16.9233	0.828898	0.05651	0.973279	380.2	3.88557	370.1	6.01279	470	2.33388	369	2.9	0.787447
KM002_43	497	1.408	0.4361	1.15823	16.8833	0.861394	0.05322	1.52198	367.4	4.25532	370.9	6.26203	334	2.59359	371.3	3.1	1.11048
KM002_18	925	2.4	0.455	1.79412	16.7504	1.28192	0.05452	1.37564	380.8	6.83203	373.9	9.39447	391	2.74427	373.6	4.5	0.956266
KM002_80	1387	3.271	0.4579	1.22565	16.7029	1.02262	0.0555	1.8018	382.7	4.69056	374.8	7.51228	430	3.95293	374.2	3.6	0.871628
KM002_86	1588	3.87	0.4518	1.35512	16.6945	1.19246	0.05459	1.53874	378.4	5.12779	374.8	8.75993	392	3.07749	374.8	4.2	0.956122
KM002_117	1528	3.1	0.447	1.00443	16.4366	0.8386	0.05328	1.03228	375.1	3.76761	380.7	6.2574	338	1.78016	381.2	3	1.12633
KM002_127	1310	2.88	0.4559	1.02958	16.4015	0.920493	0.05403	1.01795	381.3	3.92581	381.5	6.88289	370	1.92165	381.6	3.3	1.03108
KM002_96	679	2.92	0.48	1.3818	16.3132	0.998768	0.05671	1.53412	397.8	5.49681	383.5	7.50734	476	3.72572	382.4	3.7	0.805672
KM002_60	531	1.013	0.475	1.61117	16.2734	1.07936	0.0563	2.13144	394.4	6.35446	385.4	8.1533	455	4.94798	383.5	3.9	0.847033
KM002_132	1050	2.686	0.467	1.42027	15.7978	1.12841	0.05361	1.7534	389.1	5.52626	395.8	8.75387	351	3.14002	396.1	4.2	1.12764
KM002_130	49.3	2.48	0.592	2.41313	13.9276	1.06589	0.0589	3.73514	471	11.3658	446.7	9.33217	546	10.405	445.4	4.5	0.818132
KM002_136	182.3	1.63	0.568	1.79649	13.5318	1.10464	0.0559	3.04114	460	8.26387	459.8	9.95507	439	6.81154	459.8	4.9	1.04738
KM002_32	114.3	4.24	0.588	1.56185	13.3511	1.15801	0.0565	2.65487	471	7.35631	465.7	10.57	469	6.35272	465.5	5.2	0.992964
KM002_69	200	2.618	0.599	2.29975	12.87	1.05061	0.0566	3.71025	476	10.9468	482.6	9.93771	466	8.8213	482.5	4.9	1.03562
KM002_2	199	2.49	0.679	1.50281	11.5701	0.885463	0.0578	2.42215	525.6	7.89877	534.4	9.27456	513	6.33959	534.6	4.4	1.04172
KM002_131	238	1.314	0.703	1.30635	11.5075	1.05681	0.05826	1.47614	541.6	7.07522	537.2	11.1273	536	4.03679	537.1	5.4	1.00224
KM002_22	100.2	1.222	0.885	2.59426	10.1523	1.13954	0.0642	4.6729	642	16.6551	605.6	13.5261	722	17.2134	602.7	6.3	0.838781
KM002_55	429	0.964	0.917	1.55788	9.56023	0.975534	0.0636	2.98742	663	10.3287	641.5	12.2658	722	11.0047	639.4	5.8	0.888504
KM002_27	58.5	1.3	0.902	1.75347	9.3985	1.00698	0.0627	3.0303	652	11.4326	652	12.8684	687	10.6215	650.8	6.2	0.949054
KM002_11	82.8	1.595	1.627	1.37978	6.26174	1.08622	0.0736	1.90217	982	13.5494	955	20.3319	1032	10.0155	1032	10.0155	0.925388
KM002_99	171.3	1.159	1.734	1.05925	5.81734	0.890409	0.073	1.36986	1021.1	10.816	1022	17.836	1009	7.052	1009	7.052	1.01288
KM002_62	163.2	2.561	1.741	1.31874	5.93824	1.0301	0.0744	1.6129	1023	13.4907	1003	20.2506	1049	8.63232	1049	8.63232	0.956149
KM002_4	828	1.853	1.722	1.06663	5.94177	0.87914	0.07474	0.829542	1016.7	10.8444	1003	17.2828	1060	4.4863	1060	4.4863	0.946226
KM002_68	147	1.959	1.925	1.21919	5.35332	0.874011	0.0752	1.46277	1089	13.277	1106	18.9465	1070	7.98551	1070	7.98551	1.03364
KM002_12	278	1.227	2.025	1.0582	5.18672	0.9262	0.07613	1.14278	1123.5	11.8889	1136	20.6224	1096	6.39025	1096	6.39025	1.0365
KM002_70	80	2.282	1.781	1.74747	5.88235	1.47059	0.0767	2.08605	1040	18.1737	1016	29.2847	1117	11.8884	1117	11.8884	0.909579
KM002_92	42.1	1.535	2.106	1.42935	5.11247	0.96511	0.0775	2.45161	1150	16.4375	1152	21.7914	1128	14.1093	1128	14.1093	1.02128
KM002_6	1183	4.82	2.098	1.11866	5.11509	0.965604	0.0783	0.91954	1149.8	12.8623	1151	21.7836	1153	5.40934	1153	5.40934	0.998265
KM002_113	23.9	1.17	2.27	4.49519	4.80769	3.43407	0.0786	5.21628	1199	53.8973	1215	81.7788	1160	30.8719	1160	30.8719	1.04741
KM002_66	105.5	3.4	2.372	1.26906	4.662	0.951429	0.0806	1.24069	1233	15.6475	1252	23.3473	1214	7.68471	1214	7.68471	1.0313
KM002_72	53	1.839	2.48	1.50181	4.55996	0.977135	0.0826	2.30024	1265	18.9979	1278	24.4761	1255	14.7286	1255	14.7286	1.01833
KM002_58	373	3.249	2.457	1.10056	4.74608	1.04123	0.0844	1.18483	1259	13.8561	1233	25.1633	1304	7.88277	1304	7.88277	0.945552
KM002_122	224	1.528	2.864	1.30045	4.25351	1.3672	0.0868	1.6129	1372	17.8422	1361	36.4709	1355	11.1504	1355	11.1504	1.00443
KM002_121	46.5	0.753	2.766	1.49409	4.37445	0.915064	0.0861	1.8583	1348	20.1403	1330	23.8539	1357	12.8659	1357	12.8659	0.980103
KM002_33	211	1.827	3.215	1.15847	3.86847	1.02633	0.09015	1.00943	1460	16.9137	1482	29.812	1427	7.34926	1427	7.34926	1.03854
KM002_138	49.7	1.803	3.251	1.39674	3.8506	0.86442	0.0904	2.10177	1468	20.5042	1488	25.2106	1441	15.4523	1441	15.4523	1.03262
KM002_98	1808	21.66	3.911	0.978402	3.47102	0.920882	0.09795	0.520674	1615.6	15.8071	1632	29.4564	1584.3	4.20869	1584.3	4.20869	1.03011
KM002_73	475	5.88	3.83	1.33213	3.56506	1.29143	0.09971	0.862501	1598	21.2874	1593	40.3219	1620	7.12884	1620	7.12884	0.983333
KM002_137	124	1.216	4.028	1.10198	3.44353	0.808174	0.1007	1.39027	1639	18.0615	1643	26.0255	1635	11.5974	1635	11.5974	1.00489
KM002_119	293	1.544	4.141	1.23208	3.4002	1.11027	0.10114	0.879968	1661	20.4648	1662	36.1673	1643	7.37647	1643	7.37647	1.01156
KM002_25	90.4	1.291	3.614	1.34116	3.84172	1.07803	0.1017	1.86824	1552	20.8147	1491	31.504	1651	15.7371	1651	15.7371	0.903089
KM002_37	131	1.993	4.336	1.059	3.31895	0.846671	0.1026	1.16959	1699.8	18.0009	1698	28.1779	1669	9.95942	1669	9.95942	1.01738
KM002_50	145	1.891	3.69	1.79747	3.78501	1.13937	0.1034	2.61122	1569	28.2023	1511	33.743	1683	22.4218	1683	22.4218	0.897802
KM002_53	226.1	5.34	4.145	0.984712	3.46741	0.955306	0.1044	0.957854	1662.9	16.3748	1633	30.5763	1702	8.31769	1702	8.31769	0.959459
KM002_114	314	2.28	4.72	1.08094	3.09406	1.02609	0.1058	1.51229	1770	19.1327	1805	36.3011	1726	13.3174	1726	13.3174	1.04577
KM002_100	474	5.24	4.36	1.87231	3.3557	2.05451	0.1061	1.50801	1704	31.9041	1679	67.6107	1731	13.3182	1731	13.3182	0.96996
KM002_30	138.1	2.438	4.137	1.15927	3.43643	1.05197	0.1068	1.40449	1661	19.2555	1646	33.9381	1742	12.4828	1742	12.4828	0.944891
KM002_59	316	5.48	3.965	1.17096	3.74953	1.03303	0.10736	0.847615	1627	19.0515	1524	30.8571	1754	7.58529	1754	7.58529	0.868871
KM002_9	315	2.449	4.819	1.02697	3.06466	0.953799	0.10778	0.788644	1787.9	18.3612	1820	34.0239	1761	7.08572	1761	7.08572	1.0335
KM002_75	636	4.51	4.734	1.03463	3.12891	0.925902	0.1079	1.01946	1773	18.3441	1788	32.4481	1762	9.16476	1762	9.16476	1.01476
KM002_46	196.9	2.169	4.874	1.15147	3.07692	1.0675	0.10816	0.748891	1797	20.6918	1818	38.0382	1767	6.75148	1767	6.75148	1.02886
KM002_126	290.7	1.619	4.706	1.08416	3.16756	1.09895	0.10875	0.772414	1768	19.1679	1768	38.0817	1777	7.00296	1777	7.00296	0.994935
KM002_83	109.4	1.822	4.899	1.04145	3.07787	0.895095	0.1091	1.28323	1802	18.7668	1814	31.8246	1782	11.6669	1782	11.6669	1.01796
KM002_51	153.6	1.564	4.815	1.00663	3.1506	0.803724	0.1095	1.18721	1788.9	18.0077	1777	27.9931	1794	10.8666	1794	10.8666	0.990524
KM002_106	67.4	1.142	4.84	1.58121	3.125	1.75383	0.1098	1.36612	1791	28.3195	1786	61.3937	1794	12.5042	1794	12.5042	0.995541
KM002_81	187.2	1.795	4.965	1.01733	3.0525	0.809848	0.11	0.909091	1813.1	18.4451	1827	29	1802	8.35807	1802	8.35807	1.01387
KM002_5	950	2.67	4.13	1.97658	3.55872	1.99724	0.1105	2.53394	1660	32.8112	1597	62.516	1804	23.3226	1804	23.3226	0.885255
KM002_134	170.9	1.48	4.884	1.0342	3.14961	1.02844	0.11161	0.851178	1799	18.6052	1777	35.8198	1827	7.9342	1827	7.9342	0.972633
KM002_103	193	1.35	5.231	1.17042	2.99043	0.915438	0.1118	1.16279	1857	21.7346	1859	33.3553	1831	10.8626	1831	10.8626	1.01529
KM002_110	293	1.747	4.715	1.07127	3.27547	1.18652	0.1129	1.24004	1770	18.9614	1717	39.9302	1845	11.6728	1845	11.6728	0.930623
KM002_23	240.5	2.539	5.026	1.31967	3.12891	1.1015	0.1145	0.960699	1823	24.0576	1788	38.602	1872	9.17565	1872	9.17565	0.955128
KM002_118	45.5	3.88	5.61	1.45513	2.84576	1.26317	0.1147	1.39494	1916	27.8802	1940	48.0307	1872	13.3231	1872	13.3231	1.03632
KM002_135	166.9	1.588	5.59	1.00398	2.84172	0.826418	0.1147	1.04621	1914.2	19.2182	1944	31.4885	1874	10.003	1874	10.003	1.03735
KM002_94	242	2.335	5.514	1.11035	3.02024	1.18652	0.1196	1.67224	1902	21.1188	1844	42.8837	1949	16.6286	1949	16.6286	0.946126
KM002_87	129	2.291	6.955	1.02701	2.53614	0.892825	0.1267	1.1839	2105.3	21.6216	2143	37.5011	2054	12.4068	2054	12.4068	1.04333
KM002_79	270	1.995	7.36	2.42624	2.75482	2.10828	0.145	1.31034	2156	52.3098	1991	82.2727	2286	15.2829	2286	15.2829	0.870954
KM002_52	331	0.78	6.76	1.28306	2.95421	0.979712	0.1453	1.72058	2080	26.6876	1879	36.0812	2289	20.0939	2289	20.0939	0.820882
KM002_104	144.6	0.534	9.92	1.49152	2.15054	1.42638	0.1544	1.1658	2426	36.1844	2462	68.8301	2393	14.2335	2393	14.2335	1.02883
KM002_82	221	5.17	9.36	1.41723	2.29148	1.12236	0.1561	0.896861	2372	33.6168	2334	51.3437	2412	11.0369	2412	11.0369	0.967662
KM002_21	93	2.842	10.45	1.12294	2.13995	0.895286	0.1591	1.00566	2475	27.7927	2472	43.3777	2444	12.5399	2444	12.5399	1.01146
KM002_48	190.1	1.571	9.63	1.00663	2.2779	0.953001	0.1604	0.685786	2399.4	24.1532	2346	43.8205	2459	8.60381	2459	8.60381	0.954046
KM002_29	39.7	2.61	9.73	1.1536	2.22321	0.918776	0.1608	1.49254	2409	27.7901	2398	43.1832	2461	18.7405	2461	18.7405	0.974401
KM002_19	202.1	2.231	9.72	1.20727	2.39923	0.905833	0.1655	1.75227	2408	29.0711	2246	39.8762	2511	22.4487	2511	22.4487	0.894464
KM002_74	198	1.964	12.02	0.976264	1.95427	0.90734	0.1727	0.636943	2606	25.4414	2663	47.3584	2583	8.39399	2583	8.39399	1.03097
KM002_78	436	6.66	9.76	2.24783	2.44499	1.87116	0.1747	1.14482	2414	54.2625	2206	80.9046	2601	15.1922	2601	15.1922	0.848135
KM002_124	285	1.5	12.399	0.946423	1.95008	0.895444	0.1762	0.681044	2634.8	24.9363	2668	46.8253	2616	9.08986	2616	9.08986	1.01988
KM002_95	114.4	1.781	11.2	1.04774	2.1877	0.892941	0.1771	1.12931	2540	26.6126	2426	42.459	2624	15.1189	2624	15.1189	0.924543
KM002_112	383	1.774	9.75	1.51753	2.50752	1.40728	0.1782	0.953984	2411	36.5877	2163	59.6615	2635	12.8252	2635	12.8252	0.820873
KM002_64	179	1.393	12.72	0.962649	1.94856	0.884804	0.1802	0.887902	2655.9	25.567	2670	46.3036	2653	12.0184	2653	12.0184	1.00641
KM002_115	138	2.001	13.41	1.25554	1.87617	1.43585	0.1821	0.988468	2708	33.9999	2750	77.3921	2671	13.4704	2671	13.4704	1.02958
KM002_140	225	3.24	12.79	1.15683	1.94742	1.09294	0.1832	0.818777	2664	30.8181	2671	57.2171	2681	11.1997	2681	11.1997	0.99627
KM002_47	122.5	1.083	13.23	0.964104	1.93648	0.839802	0.185	0.810811	2696.2	25.9942	2684	44.1789	2697	11.1569	2697	11.1569	0.99518
KM002_26	92	2.306	13.43	1.02573	1.88111	0.854179	0.1859	0.645508	2710	27.7972	2748	46.0068	2705	8.90867	2705	8.90867	1.0159
¶ Data not corrected for common-Pb.
† 206Pb/238U ages common lead corrected by inferring the initial Pb-composition from the Stacey and Kramers (1975) two stage isotope evolution model (Vermeesch, 2018a). Analyses with greater than 10% uncertainty in 207/206 age (1-sigma) or 5% uncertainty in 206/238 age (1-sigma) are excluded. Ages >600 Ma with >20% discordance and/or 5% reverse discordance are excluded. Accepted ages calculated u…
§ Calculated based on 206Pb/238U age vs. 207Pb/206Pb age.
Decay constants: 235U = 9.8485E-10/yr, 238U = 1.55125E-10/yr; 238U/235U = 137.818
Uncertainties quoted without components related to systematic error unless otherwise stated. Total systematic uncertainties (sys): 206Pb/238U = 4.1%; 207Pb/206Pb = 2.1%
Systematic uncertainties include excess variance determined from long-term repeated analyses of Plesovice (206Pb/238U = 4.1%, 207Pb/206Pb = 2.1%); decay constant uncertainties (238U: 0.11%, 235U: 0.012%); and 91500 reference value uncertainties (Wiedenbeck et al., 1995).
Sample: DUBAKELLA E; Aliquot: 16KM003; analyzed at USC			Isotope Ratios¶						Apparent Ages¶
Analysis	U	U/Th	207Pb	± 1-sigma	238U	± 1-sigma	207Pb	± 1-sigma	207Pb	± 1-sigma	206Pb	± 1-sigma	207Pb	± 1-sigma	Best age†	± 1-sigma	Conc.§
	(ppm)		235U	(%)	206Pb	(%)	206Pb	(%)	235U	(Ma)	238U	(Ma)	206Pb	(Ma)	(Ma)	(Ma)	(%)
X16KM003_132	82.8	3.1	0.1738	2.61267	39.8565	2.23684	0.0494	2.16888	162.5	4.24558	159.7	3.57224	159	3.44853	159.7	3.5	1.0044
X16KM003_133	401	1.544	0.1701	2.60951	39.4633	2.21478	0.0483	1.26759	159.3	4.15695	161.3	3.57244	124	1.57181	161.5	3.4	1.30081
X16KM003_109	162	1.85	0.1921	2.92152	39.4011	1.84944	0.0545	2.15315	178.2	5.20615	161.6	2.98869	384	8.26811	160.5	2.9	0.420833
X16KM003_97	188	3.96	0.1805	2.48742	38.0662	1.82563	0.0487	1.88576	168.3	4.18633	167.1	3.05062	132	2.48921	167.3	3	1.26591
X16KM003_2	4.692	2.25	0.236	6.05327	30.581	2.18436	0.053	6.25722	213	12.8935	207.1	4.52381	330	20.6488	206.7	4.4	0.627576
X16KM003_93	292	1.392	0.2683	2.09178	26.3713	1.74912	0.0505	1.51546	241.2	5.04537	239.9	4.19613	210	3.18246	240.1	4	1.14238
X16KM003_74	855	2.73	0.351	2.32572	26.178	2.53767	0.0673	0.985535	304.9	7.09111	241.8	6.13607	841	8.28835	236.8	5.8	0.287515
X16KM003_72	705	1.61	0.449	2.84078	24.7525	2.1469	0.079	1.67915	378	10.7381	255.4	5.48318	1171	19.6629	246.6	5.1	0.218104
X16KM003_47	103.8	1.363	0.3105	2.30044	23.8493	1.70352	0.0527	1.54901	274.3	6.3101	264.8	4.51092	329	5.09623	264.4	4.3	0.804863
X16KM003_22	566	1.592	0.3421	2.08794	23.5294	1.80072	0.05777	0.856669	298.6	6.2346	268.3	4.83133	517	4.42898	266.3	4.6	0.518956
X16KM003_1	608	1.595	0.363	2.10828	22.8154	1.74608	0.0605	1.26497	314.7	6.63476	276.5	4.82791	617	7.80486	273.6	4.6	0.448136
X16KM003_124	760	3.45	0.401	2.41743	22.0751	2.13993	0.0637	1.44171	341.9	8.26518	285.5	6.1095	731	10.5389	281.5	5.8	0.390561
X16KM003_45	560	2.122	0.454	2.35997	21.8341	2.00517	0.0704	1.73933	379	8.9443	288.4	5.78291	937	16.2975	282.2	5.4	0.307791
X16KM003_105	475	2.56	0.382	2.53766	21.7865	1.77849	0.0592	1.12038	328	8.32354	289.2	5.14339	596	6.67747	286.8	4.9	0.485235
X16KM003_134	584	3.71	0.386	2.51137	21.2766	2.17108	0.059	1.12418	331	8.31263	296.3	6.43291	561	6.30664	293.6	6.2	0.528164
X16KM003_95	343	2.71	0.535	2.76559	18.797	3.0689	0.0723	1.19965	434	12.0027	334	10.2501	989	11.8645	326.3	9.5	0.337715
X16KM003_20	183.6	5.58	0.4075	1.87805	18.6463	1.61728	0.0544	0.872224	347	6.51684	336.7	5.44538	390	3.40167	336.3	5.2	0.863333
X16KM003_25	379	3.02	0.423	2.17108	18.622	1.99521	0.0571	1.07223	357.7	7.76596	337	6.72386	513	5.50055	335.6	6.4	0.65692
X16KM003_62	161.5	2.151	0.405	2.1416	18.5529	1.79849	0.0541	1.32031	346.5	7.42063	338.3	6.0843	365	4.81912	338.1	5.8	0.926849
X16KM003_137	2.92	4.47	0.385	8.08375	18.3486	2.71485	0.05	7.7551	337	27.2422	342	9.28478	230	17.8367	343.5	8.9	1.48696
X16KM003_4	401	3.05	0.412	2.22905	18.2482	1.86206	0.0542	1.03547	349.7	7.79498	344	6.40548	390	4.03833	343.6	6	0.882051
X16KM003_131	306	3.06	0.408	2.12585	18.1488	1.85192	0.0531	1.34517	347	7.3767	345.8	6.40394	332	4.46597	345.9	6.1	1.04157
X16KM003_139	591	5.66	0.425	2.04082	18.1159	1.84857	0.0555	1.01122	359	7.32653	346	6.39604	427	4.31789	345.5	6.1	0.810304
X16KM003_34	274	3.49	0.426	2.03603	17.762	1.72183	0.0541	1.03738	361.3	7.35616	352.8	6.0746	371	3.84869	352.9	5.8	0.950943
X16KM003_27	320	2.43	0.419	2.19181	17.762	1.72183	0.0539	1.13589	355.2	7.7853	353.2	6.08149	370	4.20279	353	5.8	0.954595
X16KM003_26	254.6	4.46	0.426	2.27556	17.6991	2.16724	0.0541	1.226	359.6	8.18291	354	7.67202	369	4.52394	354.1	7.2	0.95935
X16KM003_119	353	2.79	0.436	2.57442	17.7936	2.26959	0.0552	1.20157	367	9.44814	354	8.03435	412	4.95046	351.8	7.5	0.859223
X16KM003_68	239	3.24	0.454	2.2476	17.6056	1.97614	0.05687	0.897141	379.4	8.52738	356	7.03507	482	4.32422	354.7	6.7	0.738589
X16KM003_35	349	2.73	0.4304	2.01521	17.5439	1.79019	0.05327	0.83326	363.3	7.32126	357.6	6.40172	337	2.80809	357.5	6.1	1.06113
X16KM003_32	339.3	3.85	0.425	2.16086	17.4825	1.78393	0.05358	0.952229	359.6	7.77047	358.5	6.39539	349	3.32328	358.6	6.1	1.02722
X16KM003_50	232.7	2.89	0.4184	1.95107	17.4672	1.60413	0.05329	0.832947	356	6.9458	358.9	5.75724	338	2.81536	359.1	5.4	1.06183
X16KM003_104	191.1	2.068	0.434	1.9985	17.4216	1.95549	0.0548	1.30344	365.5	7.3045	360	7.03975	396	5.16163	359.3	6.6	0.909091
X16KM003_92	383	2.94	0.442	2.19318	17.3913	1.95209	0.0551	1.11115	371.5	8.14768	360.4	7.03531	409	4.54461	359.8	6.6	0.881174
X16KM003_59	412	2.98	0.438	2.3297	17.3611	1.86012	0.0556	1.0094	369	8.59659	360.9	6.71317	431	4.3505	360.2	6.3	0.837355
X16KM003_96	574	4.21	0.43	2.13574	17.1821	1.75328	0.05277	0.947508	362.9	7.75059	364.5	6.3907	322	3.05098	365.1	6	1.13199
X16KM003_108	254	2.76	0.44	2.31911	16.9779	1.73244	0.0549	1.1152	371	8.6039	368.7	6.38751	418	4.66154	368.5	6.1	0.882057
X16KM003_73	266	2.68	0.528	2.51237	16.7785	1.7977	0.063	1.37674	429	10.7781	372.9	6.70362	698	9.60965	369.1	6.3	0.534241
X16KM003_82	10.7	n.d	0.495	4.329	15.873	2.18659	0.0552	4.15927	405	17.5325	394	8.61516	440	18.3008	393.5	8.2	0.895455
X16KM003_111	141	4.91	0.722	2.19063	11.3122	1.78918	0.0595	1.02898	553	12.1142	546	9.76891	580	5.9681	545.4	9.2	0.941379
X16KM003_90	198.5	4.8	0.753	1.89717	11.0742	1.75153	0.05897	0.951712	569.4	10.8025	557	9.75603	562	5.34862	557.2	9.1	0.991103
X16KM003_15	30.9	2.011	1.364	2.2443	7.02741	1.79271	0.0697	1.464	872	19.5703	857	15.3635	911	13.337	856	14	0.940724
X16KM003_52	25.9	2.153	1.358	2.1415	7.02247	1.68396	0.0697	1.5372	873	18.6953	858	14.4484	908	13.9578	856	13	0.944934
X16KM003_107	70.8	4.76	1.674	2.04204	6.07533	1.76681	0.0741	1.30822	998	20.3795	982	17.35	1035	13.54	1035	13.54	0.948792
X16KM003_110	103.8	9.33	1.719	1.9589	5.83771	1.72749	0.0731	1.04693	1015	19.8828	1019	17.6031	1011	10.5845	1011	10.5845	1.00791
X16KM003_11	14.28	2.503	1.78	2.46503	5.73724	1.84411	0.0747	1.36601	1035	25.5131	1035	19.0866	1061	14.4933	1061	14.4933	0.975495
X16KM003_140	7.28	3.19	1.885	2.97732	5.56483	2.24297	0.0755	2.23003	1083	32.2444	1064	23.8652	1074	23.9505	1074	23.9505	0.990689
X16KM003_64	28.5	1.959	2.003	2.11418	5.22193	2.02483	0.076	1.40977	1115	23.5731	1129	22.8603	1087	15.3242	1087	15.3242	1.03864
X16KM003_36	40.3	2.609	1.877	1.92991	5.58347	1.70923	0.0756	0.944822	1074	20.7273	1062	18.152	1088	10.2797	1088	10.2797	0.976103
X16KM003_136	20	1.97	1.855	2.47538	5.70776	2.12585	0.0756	1.68718	1067	26.4123	1040	22.1088	1104	18.6265	1104	18.6265	0.942029
X16KM003_114	42	1.86	1.936	2.34546	5.47345	1.95481	0.0773	1.32006	1091	25.589	1081	21.1314	1120	14.7847	1120	14.7847	0.965179
X16KM003_141	15.5	0.749	1.947	2.88251	5.43183	2.16165	0.0771	1.65436	1098	31.6499	1088	23.5187	1122	18.5619	1122	18.5619	0.969697
X16KM003_56	8.48	1.817	2.012	2.38366	5.25486	1.76949	0.078	1.76609	1117	26.6255	1122	19.8537	1133	20.0098	1133	20.0098	0.990291
X16KM003_58	5.68	3.13	2.02	3.28349	5.43774	2.08077	0.0799	2.74578	1122	36.8408	1088	22.6387	1170	32.1256	1170	32.1256	0.929915
X16KM003_48	69.6	2.28	2.373	1.91353	4.76872	1.58146	0.0826	1.05006	1236	23.6513	1227	19.4045	1255	13.1782	1255	13.1782	0.977689
X16KM003_53	40.4	0.988	2.638	1.89538	4.4843	1.57866	0.0853	0.957006	1310	24.8294	1297	20.4752	1326	12.6899	1326	12.6899	0.97813
X16KM003_142	47	2.73	2.595	2.16271	4.61255	2.00034	0.0857	1.13114	1302	28.1585	1264	25.2843	1326	14.9989	1326	14.9989	0.953243
X16KM003_37	33.1	1.223	2.675	2.09804	4.4484	2.08802	0.0868	1.29314	1320	27.6941	1312	27.3949	1367	17.6773	1367	17.6773	0.959766
X16KM003_63	4.82	1.034	2.64	3.67192	4.69484	2.13184	0.0876	2.85388	1309	48.0655	1244	26.5201	1380	39.3836	1380	39.3836	0.901449
X16KM003_121	37.2	2.222	2.94	2.256	4.18585	1.72987	0.0891	1.25976	1391	31.381	1381	23.8895	1403	17.6745	1403	17.6745	0.984319
X16KM003_66	109.5	2.116	3.047	2.00934	4.07664	1.91353	0.09	0.907029	1422	28.5728	1414	27.0572	1428	12.9524	1428	12.9524	0.990196
X16KM003_76	106.4	1.128	3.221	2.05919	3.96668	1.90239	0.0912	1.11887	1464	30.1466	1455	27.6797	1446	16.1788	1446	16.1788	1.00622
X16KM003_51	52.4	2.854	3.169	1.77098	4.02901	1.72672	0.0923	0.939704	1449	25.6615	1429	24.6748	1471	13.823	1471	13.823	0.971448
X16KM003_117	74.6	1.674	3.345	2.13538	3.87297	1.81792	0.0943	1.02798	1494	31.9026	1480	26.9053	1511	15.5328	1511	15.5328	0.979484
X16KM003_122	156.6	0.869	3.47	2.20549	4.08998	1.94065	0.1021	1.04939	1521	33.5456	1409	27.3438	1658	17.3989	1658	17.3989	0.849819
X16KM003_67	123.4	5.42	4.304	1.89667	3.28192	2.00934	0.1031	1.03921	1696	32.1675	1713	34.4199	1677	17.4276	1677	17.4276	1.02147
X16KM003_100	150	2.32	4.43	2.18823	3.28947	1.84613	0.1039	1.08032	1720	37.6376	1710	31.5689	1697	18.333	1697	18.333	1.00766
X16KM003_98	70.7	3.48	4.47	1.94037	3.28947	1.6783	0.1049	0.924107	1724	33.452	1711	28.7158	1714	15.8392	1714	15.8392	0.99825
X16KM003_77	72	2.2	4.43	1.95789	3.28515	2.01132	0.1046	1.02431	1717	33.617	1712	34.4337	1716	17.5772	1716	17.5772	0.997669
X16KM003_70	33.8	2.636	4.09	2.2454	3.54233	2.16877	0.1054	1.06494	1654	37.1389	1601	34.7221	1717	18.2851	1717	18.2851	0.93244
X16KM003_86	144	5.09	4.7	2.27964	3.18878	2.115	0.1065	0.81441	1764	40.2128	1757	37.1606	1739	14.1626	1739	14.1626	1.01035
X16KM003_101	93.4	1.24	4.01	2.03573	3.71609	2.08556	0.1067	0.812884	1635	33.2841	1542	32.1594	1746	14.1929	1746	14.1929	0.883162
X16KM003_12	10.9	1.561	4.93	2.06979	3.00662	1.68739	0.1082	1.17884	1809	37.4426	1850	31.2166	1763	20.783	1763	20.783	1.04935
X16KM003_43	32.42	1.755	4.51	2.14942	3.31345	1.69054	0.1082	0.848768	1731	37.2064	1700	28.7391	1767	14.9977	1767	14.9977	0.962083
X16KM003_6	38.3	1.98	4.8	2.33844	3.1506	2.08968	0.1084	1.03547	1782	41.6709	1776	37.1128	1775	18.3796	1775	18.3796	1.00056
X16KM003_143	17.3	0.997	4.38	2.21321	3.42583	1.74787	0.109	1.26381	1710	37.846	1651	28.8574	1777	22.4579	1777	22.4579	0.929094
X16KM003_128	109.8	3.62	4.63	2.3141	3.23625	1.98138	0.1086	1.03356	1750	40.4968	1735	34.3769	1780	18.3974	1780	18.3974	0.974719
X16KM003_118	216	2.54	4.68	2.07134	3.20616	1.79937	0.1091	0.888531	1765	36.5592	1750	31.489	1782	15.8336	1782	15.8336	0.982043
X16KM003_85	304	1.398	4.11	2.48274	3.74532	2.48414	0.1093	0.746868	1652	41.0149	1524	37.8583	1785	13.3316	1785	13.3316	0.853782
X16KM003_30	102.7	8.18	4.95	1.85529	3.08261	1.73004	0.1091	0.795002	1810	33.5807	1810	31.3137	1786	14.1987	1786	14.1987	1.01344
X16KM003_29	28.9	2.51	4.5	2.04082	3.38639	1.72775	0.1094	0.932731	1730	35.3061	1667	28.8016	1794	16.7332	1794	16.7332	0.929208
X16KM003_125	101.5	2.82	4.53	2.13993	3.3456	2.04833	0.1102	1.11115	1738	37.192	1684	34.4938	1798	19.9785	1798	19.9785	0.936596
X16KM003_55	30.8	1.212	4.904	1.76865	3.12207	1.75218	0.1106	0.83035	1805	31.9242	1790	31.3641	1807	15.0044	1807	15.0044	0.990592
X16KM003_126	135.7	4.67	4.57	2.34448	3.29272	2.18395	0.1103	1.1564	1756	41.1691	1708	37.3018	1812	20.954	1812	20.954	0.942605
X16KM003_38	24.81	1.67	4.75	1.9334	3.23834	1.53656	0.1111	1.05623	1775	34.3179	1734	26.644	1814	19.16	1814	19.16	0.955899
X16KM003_145	62.4	2.93	4.92	1.9703	3.12207	1.75218	0.1111	0.78069	1807	35.6033	1790	31.3641	1815	14.1695	1815	14.1695	0.986226
X16KM003_106	110.1	2.684	4.98	2.04901	3.07977	1.88557	0.112	0.683309	1814	37.1691	1812	34.1665	1830	12.5046	1830	12.5046	0.990164
X16KM003_116	229	3.29	4.47	2.39693	3.4965	2.31911	0.1131	0.857107	1721	41.2512	1619	37.5464	1847	15.8308	1847	15.8308	0.876557
X16KM003_44	19.15	3.6	5.17	1.97371	3.05437	1.55835	0.114	1.29789	1845	36.415	1825	28.4399	1864	24.1926	1864	24.1926	0.979077
X16KM003_40	28	4.12	5.51	2.12971	2.88101	1.76389	0.1148	1.15551	1904	40.5496	1920	33.8666	1892	21.8623	1892	21.8623	1.0148
X16KM003_130	90	3.12	5.44	2.34469	3.0581	2.34039	0.118	1.12418	1888	44.2677	1825	42.712	1923	21.618	1923	21.618	0.949038
X16KM003_120	46.4	1.022	5.67	2.15959	2.93513	1.79702	0.1203	0.933042	1923	41.529	1889	33.9457	1957	18.2596	1957	18.2596	0.965253
X16KM003_23	95.4	0.818	5.11	1.99688	3.31236	1.85898	0.1213	0.672981	1839	36.7227	1700	31.6026	1978	13.3116	1978	13.3116	0.859454
X16KM003_88	106.3	4.71	6.54	1.87231	2.67165	1.77202	0.125	0.897959	2054	38.4572	2049	36.3086	2026	18.1927	2026	18.1927	1.01135
X16KM003_16	30.24	2.16	6.67	1.9888	2.74273	1.81916	0.1316	1.04677	2071	41.1881	2003	36.4378	2116	22.1497	2116	22.1497	0.946597
X16KM003_99	62.1	2.22	7.56	1.95713	2.49377	2.03573	0.1367	0.821104	2179	42.6459	2173	44.2363	2188	17.9658	2188	17.9658	0.993144
X16KM003_49	124.2	1.104	7.09	2.5906	2.71739	2.35692	0.1388	1.39681	2117	54.843	2031	47.8691	2206	30.8137	2206	30.8137	0.920671
X16KM003_41	23.4	1.864	7.9	2.00207	2.48139	1.89902	0.141	0.868432	2221	44.4659	2179	41.3797	2242	19.4703	2242	19.4703	0.9719
X16KM003_94	43.6	1.546	9.02	2.14942	2.2779	1.85951	0.1468	0.868876	2346	50.4254	2345	43.6056	2306	20.0363	2306	20.0363	1.01691
X16KM003_138	95.9	3.07	10.3	2.03091	2.24215	1.83033	0.1661	0.7372	2464	50.0416	2376	43.4886	2517	18.5553	2517	18.5553	0.943981
X16KM003_39	54.9	2.306	10.7	1.85962	2.1427	1.63982	0.1667	0.673335	2500	46.4906	2468	40.4709	2523	16.9882	2523	16.9882	0.978201
X16KM003_46	61.5	1.736	10.74	1.80519	2.12766	1.51976	0.1665	1.04186	2500	45.1298	2483	37.7356	2524	26.2965	2524	26.2965	0.983756
X16KM003_14	32.6	1.95	10.12	1.81496	2.30044	1.64317	0.1673	0.792905	2448	44.4301	2326	38.2201	2529	20.0526	2529	20.0526	0.919731
X16KM003_24	138.8	2.13	9.12	2.34962	2.5	2.29592	0.1686	1.27097	2353	55.2867	2179	50.0281	2539	32.27	2539	32.27	0.858212
X16KM003_129	64.7	2.48	10.63	2.7838	2.17865	2.55658	0.168	1.45773	2487	69.2332	2432	62.176	2543	37.07	2543	37.07	0.956351
X16KM003_10	40.95	1.57	11.33	1.93634	2.13174	1.7402	0.1739	0.82149	2549	49.3574	2478	43.1221	2594	21.3095	2594	21.3095	0.955281
X16KM003_60	35.2	3.05	12.28	1.82809	1.97044	1.70906	0.1762	0.868679	2625	47.9874	2645	45.2046	2620	22.7594	2620	22.7594	1.00954
X16KM003_103	258	1.903	9.66	2.42954	2.57069	2.09853	0.178	1.17519	2405	58.4305	2127	44.6356	2630	30.9075	2630	30.9075	0.808745
X16KM003_42	57.3	1.273	11.13	2.06282	2.20216	1.79768	0.178	0.945884	2535	52.2925	2412	43.36	2636	24.9335	2636	24.9335	0.915023
X16KM003_19	65.6	3.003	11.49	1.77617	2.16732	1.65866	0.1793	0.910571	2563	45.5232	2445	40.5543	2644	24.0755	2644	24.0755	0.924735
X16KM003_115	10.03	2.17	12.55	2.27661	1.9802	2.02061	0.1808	1.10055	2642	60.148	2634	53.2229	2657	29.2416	2657	29.2416	0.991344
X16KM003_91	29.6	1.168	13.17	2.09195	1.92678	1.8678	0.1842	0.886348	2693	56.3363	2693	50.2998	2689	23.8339	2689	23.8339	1.00149
X16KM003_5	59.8	1.126	10.88	1.78196	2.31911	1.89315	0.1838	0.666208	2512	44.7629	2310	43.7318	2691	17.9276	2691	17.9276	0.858417
X16KM003_146	41.6	1.005	13.4	2.1322	1.90114	2.03694	0.1841	1.19168	2705	57.6759	2721	55.425	2692	32.0799	2692	32.0799	1.01077
X16KM003_127	32.5	2.1	13.47	2.34838	1.92308	1.86421	0.1871	1.09076	2708	63.5941	2698	50.2963	2713	29.5924	2713	29.5924	0.994471
X16KM003_112	43.8	2.001	13.3	1.91806	1.95312	1.79369	0.1883	0.97543	2699	51.7685	2665	47.8017	2730	26.6292	2730	26.6292	0.97619
X16KM003_28	94.6	3.82	13.9	1.98209	2.02429	1.85904	0.2025	0.755858	2741	54.329	2584	48.0377	2845	21.5042	2845	21.5042	0.90826
X16KM003_61	35.1	2.525	13.46	2.1606	2.12314	2.16647	0.207	0.714779	2709	58.5306	2485	53.8368	2881	20.5928	2881	20.5928	0.862548
X16KM003_81	15.31	1.935	18.48	2.01542	1.66667	1.78571	0.2201	1.06631	3020	60.8656	3028	54.0714	2983	31.8079	2983	31.8079	1.01509
¶ Data not corrected for common-Pb.
† 206Pb/238U ages common lead corrected by inferring the initial Pb-composition from the Stacey and Kramers (1975) two stage isotope evolution model (Vermeesch, 2018a). Analyses with greater than 10% uncertainty in 207/206 age (1-sigma) or 5% uncertainty in 206/238 age (1-sigma) are excluded. Ages >600 Ma with >20% discordance and/or 5% reverse discordance are excluded. Accepted ages calculated u…
§ Calculated based on 206Pb/238U age vs. 207Pb/206Pb age.
Decay constants: 235U = 9.8485E-10/yr, 238U = 1.55125E-10/yr; 238U/235U = 137.818
Uncertainties quoted without components related to systematic error unless otherwise stated. Total systematic uncertainties (sys): 206Pb/238U = 4.1%; 207Pb/206Pb = 2.1%
Systematic uncertainties include excess variance determined from long-term repeated analyses of Plesovice (206Pb/238U = 4.1%, 207Pb/206Pb = 2.1%); decay constant uncertainties (238U: 0.11%, 235U: 0.012%); and 91500 reference value uncertainties (Wiedenbeck et al., 1995).
Sample: DUBAKELLA E; Aliquot: TLKM001; analyzed at USC			Isotope Ratios¶						Apparent Ages¶
Analysis	U	U/Th	207Pb	± 1-sigma	238U	± 1-sigma	207Pb	± 1-sigma	207Pb	± 1-sigma	206Pb	± 1-sigma	207Pb	± 1-sigma	Best age†	± 1-sigma	Conc.§
	(ppm)		235U	(%)	206Pb	(%)	206Pb	(%)	235U	(Ma)	238U	(Ma)	206Pb	(Ma)	(Ma)	(Ma)	(%)
KM001_58	631	2.231	0.1849	1.82117	40.1929	0.984316	0.0503	1.21719	172.7	3.14516	168.9	1.46057	226	2.95133	168.6	1.4	0.747345
KM001_56	1016	2.01	0.1905	1.84798	39.1083	0.857989	0.0492	1.037	177.5	3.28017	169.4	1.33067	267	3.6996	169	1.3	0.634457
KM001_72	1930	1.316	0.1855	1.70526	39.0168	1.19439	0.0519	1.9661	172.8	2.9467	172.5	1.42789	179	2.02009	172.5	1.4	0.963687
KM001_34	231	2.057	0.1978	2.34725	37.4672	1.22342	0.05	2.04082	183.2	4.30016	172.7	1.55721	314	6.09141	172.1	1.5	0.55
KM001_102	1330	1.188	0.196	1.74406	36.7107	1.3111	0.0511	1.09829	181.7	3.16897	180.8	1.45906	203	2.47286	180.7	1.4	0.89064
KM001_62	867	2.301	0.2222	1.85988	31.5956	0.967211	0.05039	1.31626	203.6	3.78672	200.8	1.94216	208	2.73783	200.8	1.9	0.965385
KM001_57	328	4.72	0.2771	2.02535	25.4972	0.962649	0.0507	1.61011	248.2	5.02692	248	2.38737	230	3.70326	248.1	2.3	1.07826
KM001_69	286	1.672	0.2883	2.30061	24.8386	1.14055	0.0515	1.5851	257	5.91256	254.4	2.90155	262	4.15296	254.4	2.7	0.970992
KM001_97	152	1.705	0.325	2.98273	22.5377	1.0234	0.0531	2.49817	286	8.53061	279.8	2.86347	320	7.99416	279.4	2.7	0.874375
KM001_114	1210	3.73	0.3324	1.99538	21.5517	1.31949	0.05124	1.29443	291.3	5.81255	293.6	3.87403	248	3.21018	292.7	3.7	1.18387
KM001_14	300	2.696	0.3752	1.90375	20.9468	0.887032	0.0581	1.40504	324.6	6.17956	300.6	2.66642	544	7.6434	298.5	2.5	0.552574
KM001_87	1550	2.55	0.3995	1.66024	18.9717	1.06474	0.05531	1.10693	341.2	5.66473	331.1	3.52535	422	4.67126	330.2	3.4	0.784597
KM001_84	1450	5.01	0.477	2.24618	18.9502	0.821818	0.0653	1.79704	396	8.89488	331.5	2.72433	774	13.9091	326.6	2.5	0.428295
KM001_46	407.2	1.011	0.469	2.2845	18.1851	0.927813	0.0619	1.81333	390	8.90953	345.1	3.20188	657	11.9136	341.5	3	0.525266
KM001_98	320.6	2.81	0.417	1.95762	18.0375	0.920282	0.0544	1.5006	353.8	6.92605	347.8	3.20074	378	5.67227	347.4	3	0.920106
KM001_39	827	2.286	0.4183	1.70759	17.6991	0.803684	0.05412	1.13127	354.7	6.05683	354.3	2.84745	373	4.21965	354.1	2.8	0.949866
KM001_45	700	2.64	0.4312	1.77483	17.4795	0.98099	0.05444	1.21834	363.8	6.45683	358.6	3.51783	385	4.69062	358.4	3.3	0.931429
KM001_100	765	2.392	0.4248	1.68146	17.4307	0.782604	0.05307	1.24979	359.4	6.04318	359.6	2.81424	327	4.08682	359.9	2.6	1.09969
KM001_8	728	1.536	0.4199	1.70109	17.4277	0.755792	0.05327	1.2451	357.4	6.07968	359.7	2.71858	336	4.18354	359.9	2.6	1.07054
KM001_108	593	3.435	0.4224	1.69102	17.298	0.732519	0.05309	1.24932	357.7	6.04877	362.3	2.65392	334	4.17274	362.6	2.5	1.08473
KM001_20	650	2.6	0.4318	1.77236	16.9262	0.803131	0.05346	1.24068	364.3	6.45672	370	2.97159	343	4.25552	370.3	2.9	1.07872
KM001_29	679	2.407	0.4347	1.76054	16.909	0.948976	0.05334	1.14782	366.4	6.45061	370.4	3.51501	340	3.90257	370.7	3.4	1.08941
KM001_1	300	2.581	0.4356	1.87403	16.8691	0.860668	0.05378	1.32816	367	6.87768	371.2	3.1948	356	4.72826	371.4	3.1	1.0427
KM001_92	934	4.78	0.4403	1.85402	16.7785	0.941652	0.05374	1.13927	370.3	6.86545	373.2	3.51424	356	4.05581	373.4	3.3	1.04831
KM001_66	272.6	1.09	0.776	1.84094	10.6078	0.757702	0.05976	1.28063	583	10.7327	580.7	4.39997	590	7.55573	580.5	4.2	0.984237
KM001_95	1155	80.5	0.9398	1.62866	8.99281	0.82587	0.06164	1.07603	672.7	10.956	679.9	5.61509	663	7.13408	680.2	5.2	1.02549
KM001_68	537	4.817	1.478	1.65696	6.56599	0.837499	0.06939	1.10291	921.1	15.2622	913.7	7.65222	917	10.1136	917	10.1136	0.996401
KM001_83	152	3.24	1.663	1.90214	5.93824	0.757429	0.0716	1.28264	994	18.9073	1003.2	7.59853	970	12.4416	970	12.4416	1.03423
KM001_79	176.4	3.11	1.836	1.69512	5.50964	0.787092	0.0736	1.17846	1057.9	17.9327	1075	8.46124	1027	12.1028	1027	12.1028	1.04674
KM001_41	86.3	1.307	1.903	1.7963	5.41125	0.855862	0.0751	1.2908	1084	19.4719	1093	9.35457	1067	13.7728	1067	13.7728	1.02437
KM001_35	486	1.938	1.974	1.68	5.33903	0.735478	0.07624	1.13765	1106.3	18.5859	1106.7	8.13954	1099	12.5028	1099	12.5028	1.00701
KM001_27	145	1.264	1.908	1.76486	5.59597	0.742323	0.077	1.19268	1085	19.1487	1059.6	7.86565	1124	13.4058	1124	13.4058	0.942705
KM001_26	151.1	1.937	2.14	1.74042	5.005	0.766072	0.0782	1.30487	1161	20.2062	1174	8.99369	1154	15.0582	1154	15.0582	1.01733
KM001_54	222.3	2.84	2.243	1.63775	4.88759	0.7481	0.07956	1.09018	1195.6	19.5809	1200	8.9772	1184	12.9077	1184	12.9077	1.01351
KM001_6	39.57	1.534	2.373	1.95653	4.64468	1.06638	0.0806	1.58252	1234	24.1436	1257	13.4044	1204	19.0535	1204	19.0535	1.04402
KM001_89	303	6.93	2.48	1.68697	4.53515	0.809848	0.082	1.05774	1266.1	21.3587	1284	10.3984	1244	13.1583	1244	13.1583	1.03215
KM001_2	154.3	1.354	2.63	1.88174	4.5106	1.15066	0.08604	1.12667	1309	24.632	1290	14.8436	1337	15.0636	1337	15.0636	0.964847
KM001_105	69.3	0.981	2.795	1.82542	4.3122	1.25406	0.0869	1.29166	1355	24.7344	1344	16.8546	1355	17.5019	1355	17.5019	0.991882
KM001_49	117.6	1.328	3.064	1.66516	4.02576	0.780505	0.0899	1.1918	1423.2	23.6985	1430	11.1612	1421	16.9355	1421	16.9355	1.00633
KM001_32	179.9	1.848	3.168	1.61049	3.94011	0.864412	0.0911	1.1201	1451.2	23.3715	1458	12.6031	1445	16.1854	1445	16.1854	1.009
KM001_48	67	1.491	3.786	1.75189	3.61402	0.792872	0.099	1.28839	1589	27.8375	1574	12.4798	1601	20.6272	1601	20.6272	0.983136
KM001_3	124.2	0.916	3.886	1.70681	3.47102	0.850045	0.0997	1.07465	1610.4	27.4864	1632	13.8727	1617	17.3771	1617	17.3771	1.00928
KM001_4	69.3	1.437	4.135	1.8508	3.38983	0.899343	0.1019	1.3018	1661	30.7418	1667	14.992	1656	21.5577	1656	21.5577	1.00664
KM001_82	479	1.35	4.127	1.73076	3.44116	1.05342	0.10269	1.04336	1659	28.7134	1644	17.3181	1672	17.445	1672	17.445	0.983254
KM001_99	518.3	2.925	4.188	1.58373	3.4626	0.759653	0.10426	1.02765	1671.3	26.4688	1635	12.4203	1700	17.4701	1700	17.4701	0.961765
KM001_86	704	2.267	3.87	2.10937	3.75094	1.30135	0.1056	1.06293	1604	33.8343	1523	19.8195	1723	18.3142	1723	18.3142	0.883923
KM001_70	119.4	1.857	4.762	1.71425	3.08547	0.897304	0.1061	1.106	1778	30.4794	1810	16.2412	1735	19.1892	1735	19.1892	1.04323
KM001_43	920	2.13	4.71	1.94982	3.11042	1.17434	0.10635	1.05543	1768	34.4729	1797	21.1029	1736	18.3223	1736	18.3223	1.03514
KM001_111	154	1.986	4.825	1.79761	3.0931	0.915306	0.1065	1.24557	1789	32.1592	1806	16.5304	1738	21.648	1738	21.648	1.03913
KM001_80	91.2	1.166	4.874	1.67486	3.04229	0.853703	0.1074	1.14012	1799	30.1307	1832	15.6398	1753	19.9863	1753	19.9863	1.04507
KM001_65	224.2	0.754	3.89	1.83621	3.82702	1.17154	0.1075	1.13906	1611	29.5813	1496	17.5262	1756	20.0019	1756	20.0019	0.851936
KM001_61	128	0.997	4.912	1.6619	3.0349	0.836146	0.1078	1.08856	1806	30.014	1836	15.3516	1764	19.2022	1764	19.2022	1.04082
KM001_15	308	5.09	4.859	1.68003	3.07598	0.737607	0.10816	0.990596	1796.3	30.1784	1815	13.3876	1767	17.5038	1767	17.5038	1.02716
KM001_9	267	3.09	4.715	1.73134	3.15159	1.15773	0.1085	1.08154	1769	30.6274	1776	20.5612	1773	19.1757	1773	19.1757	1.00169
KM001_88	308.7	2.829	4.783	1.8134	3.1506	1.28596	0.1081	1.36873	1782	32.3147	1777	22.8515	1775	24.2949	1775	24.2949	1.00113
KM001_10	450.7	3.52	4.08	2.0008	3.70508	1.20982	0.1099	1.11419	1648	32.9732	1540	18.6312	1796	20.0108	1796	20.0108	0.857461
KM001_106	286	3.358	4.27	2.03126	3.52237	1.25799	0.1103	1.20266	1686	34.247	1611	20.2662	1803	21.6839	1803	21.6839	0.893511
KM001_13	427.9	0.98	4.132	1.60519	3.65764	0.89575	0.11001	1.06669	1660.3	26.651	1558	13.9558	1804	19.2431	1804	19.2431	0.863636
KM001_90	307	1.645	4.223	1.93305	3.61795	1.42134	0.1101	1.1585	1678	32.4366	1573	22.3576	1807	20.9341	1807	20.9341	0.870504
KM001_113	297	1.228	4.7	2.06253	3.31236	1.23368	0.1114	1.37398	1767	36.4449	1701	20.985	1820	25.0064	1820	25.0064	0.934615
KM001_16	98.1	2.183	4.963	1.85043	3.08452	1.14882	0.1117	1.14191	1812	33.5298	1810	20.7937	1830	20.8969	1830	20.8969	0.989071
KM001_33	68.5	1.044	5.087	1.70503	3.03582	0.789933	0.1125	1.17914	1833	31.2531	1835	14.4953	1847	21.7787	1847	21.7787	0.993503
KM001_22	67.3	3.192	5.387	1.79949	2.86615	0.979756	0.1139	1.20944	1882	33.8665	1929	18.8995	1864	22.5439	1864	22.5439	1.03487
KM001_25	320	2.376	4.462	1.82951	3.5868	0.9699	0.1154	1.19372	1723	31.5224	1585	15.3729	1883	22.4777	1883	22.4777	0.841742
KM001_17	41.6	0.683	5.468	1.77284	2.89436	0.797425	0.1158	1.32177	1895	33.5953	1916	15.2787	1889	24.9683	1889	24.9683	1.01429
KM001_94	143.6	2.203	5.682	1.61627	2.90613	0.74136	0.11966	1.02331	1928.2	31.165	1906	14.1303	1950	19.9545	1950	19.9545	0.977436
KM001_11	681	3.115	5.334	1.72172	3.09023	0.930224	0.12001	1.02032	1874	32.2651	1807	16.8091	1955	19.9473	1955	19.9473	0.924297
KM001_50	454	4.38	6.185	1.64981	2.69687	0.756775	0.12096	1.05449	2003.5	33.054	2033	15.3852	1969	20.7629	1969	20.7629	1.0325
KM001_78	145	0.694	5.895	1.64442	2.86123	0.832093	0.1227	1.03954	1960.1	32.2323	1932	16.076	1994	20.7283	1994	20.7283	0.968907
KM001_104	90.1	0.752	6.304	1.6996	2.67738	0.778625	0.1226	1.16523	2020	34.3319	2046	15.9307	1996	23.258	1996	23.258	1.02505
KM001_31	357	1.509	5.52	2.40314	3.23206	1.63252	0.1308	1.13119	1899	45.6355	1736	28.3406	2106	23.8228	2106	23.8228	0.824311
KM001_36	132	2.13	8.27	1.91249	2.36967	0.979302	0.141	1.15791	2259	43.2032	2269	22.2204	2241	25.9488	2241	25.9488	1.01249
KM001_12	348	1.569	8.48	1.80497	2.35294	1.44058	0.1456	1.19141	2283	41.2074	2282	32.874	2294	27.331	2294	27.331	0.994769
KM001_38	86.2	1.37	8.19	1.74429	2.57666	0.867649	0.153	1.20048	2251	39.2639	2114	18.3421	2381	28.5834	2381	28.5834	0.887862
KM001_18	95.8	1.374	9.95	1.74341	2.26193	0.842454	0.1635	1.09218	2430	42.3649	2359	19.8735	2490	27.1953	2490	27.1953	0.94739
KM001_28	76	1.528	10.42	1.66477	2.22816	0.966296	0.1688	1.05789	2472	41.1532	2389	23.0848	2544	26.9127	2544	26.9127	0.939072
KM001_51	296	2.496	11.468	1.60162	2.09424	0.769313	0.1744	1.05317	2563.3	41.0543	2516	19.3559	2599	27.372	2599	27.372	0.968065
KM001_19	319	1.472	10.45	3.17352	2.331	2.4975	0.1772	1.06532	2464	78.1955	2293	57.2677	2625	27.9648	2625	27.9648	0.873524
KM001_75	149	1.838	11.17	1.78138	2.19298	1.23076	0.1793	1.16667	2537	45.1935	2421	29.7966	2645	30.8584	2645	30.8584	0.915312
KM001_24	418	11.54	12.18	1.8431	2.05634	1.04915	0.1813	1.09752	2617	48.234	2554	26.7954	2663	29.2268	2663	29.2268	0.959069
KM001_112	104.5	2.458	13.56	1.65553	1.85288	0.812999	0.1825	1.06234	2719	45.0138	2782	22.6176	2674	28.407	2674	28.407	1.04039
KM001_40	129	0.929	12.99	1.64962	1.95198	0.936154	0.1841	1.0254	2681	44.2263	2666	24.9579	2691	27.5934	2691	27.5934	0.99071
KM001_74	225.4	1.428	12.94	1.89257	2.002	0.980573	0.188	1.13982	2673	50.5883	2611	25.6027	2723	31.0372	2723	31.0372	0.958869
KM001_37	169.2	7.25	12.74	1.92228	2.05339	1.25718	0.1897	1.04892	2658	51.0941	2556	32.1334	2738	28.7194	2738	28.7194	0.933528
¶ Data not corrected for common-Pb.
† 206Pb/238U ages common lead corrected by inferring the initial Pb-composition from the Stacey and Kramers (1975) two stage isotope evolution model (Vermeesch, 2018a). Analyses with greater than 10% uncertainty in 207/206 age (1-sigma) or 5% uncertainty in 206/238 age (1-sigma) are excluded. Ages >600 Ma with >20% discordance and/or 5% reverse discordance are excluded. Accepted ages calculated u…
§ Calculated based on 206Pb/238U age vs. 207Pb/206Pb age.
Decay constants: 235U = 9.8485E-10/yr, 238U = 1.55125E-10/yr; 238U/235U = 137.818
Uncertainties quoted without components related to systematic error unless otherwise stated. Total systematic uncertainties (sys): 206Pb/238U = 4.1%; 207Pb/206Pb = 2.1%
Systematic uncertainties include excess variance determined from long-term repeated analyses of Plesovice (206Pb/238U = 4.1%, 207Pb/206Pb = 2.1%); decay constant uncertainties (238U: 0.11%, 235U: 0.012%); and 91500 reference value uncertainties (Wiedenbeck et al., 1995).
Sample: 16KM011; analyzed at CSUN			Isotope Ratios¶						Apparent Ages¶
Analysis	U	U/Th	207Pb	± 1-sigma	238U	± 1-sigma	207Pb	± 1-sigma	207Pb	± 1-sigma	206Pb	± 1-sigma	207Pb	± 1-sigma	Best age†	± 1-sigma	Conc.§
	(ppm)		235U	(%)	206Pb	(%)	206Pb	(%)	235U	(Ma)	238U	(Ma)	206Pb	(Ma)	(Ma)	(Ma)	(%)
X16km011_3	1039	0.84	0.1591	3.01441	43.6681	1.98623	0.0505	1.61649	149.5	4.28571	145.96	2.81	217	36.7	145.7	2.8	0.672627
X16km011_2	606	1.153	0.1623	2.452	42.9	1.07036	0.0495	1.13379	152.4	3.46939	148.54	1.54	170.5	25.9	148.5	1.5	0.871202
X16km011_18.1	423	1.149	0.168	2.6725	40.6504	1.2551	0.0507	1.81138	157.4	3.87755	156.66	1.9	226.2	41	156.4	1.9	0.692573
X16km011_8	237	0.896	0.2141	2.19238	35.1124	0.770122	0.0543	1.78524	196.6	3.92857	181.03	1.35	382.5	39.3	180	1.3	0.473281
X16km011_2.1	23.38	1.124	0.224	4.55539	34.965	1.02143	0.0558	4.48029	203	8.16327	181.78	1.79	443.4	97.6	180.4	1.8	0.409968
X16km011_37.1	26.3	1.264	0.223	4.34703	33.3333	0.964287	0.0533	4.02037	203	8.16327	190.55	1.77	340.6	89.2	189.8	1.8	0.559454
X16km011_4.1	1110	2.6	0.212	2.88795	31.8471	0.977246	0.05	2.55102	195	5.10204	199.3	1.88	193.9	58.1	199.3	1.9	1.02785
X16km011_14	594	0.929	0.323	1.8955	22.5734	1.06229	0.0532	1.53445	284.8	4.94898	279.43	2.85	336.3	34.1	279	2.8	0.830895
X16km011_2.2	2140	1.129	0.474	2.90623	16.1812	1.48194	0.0551	2.3149	401	10.2041	386.56	5.45	415.3	50.7	386.2	5.4	0.930797
X16km011_29	184	0.844	0.621	1.88964	13.0378	0.860919	0.0587	1.39068	489	7.14286	476.4	3.87	555	29.7	475.2	3.9	0.858378
X16km011_24.1	69.4	1.2	1.347	2.49989	7.1736	1.2802	0.0706	1.44534	861	14.2857	841.27	9.89	944.9	29	944.9	29	0.890327
X16km011_18.2	750	3.13	1.427	3.4681	7.2727	1.75383	0.0724	2.39599	895	20.9184	830.5	13.4	996.3	47.7	996.3	47.7	0.833584
X16km011_2.3	606	1.513	1.68	1.91327	5.787	1.05797	0.0727	1.26323	998	12.2449	1027.53	9.85	1004.7	25.1	1004.7	25.1	1.02272
X16km011_15.1	456	1.688	1.704	2.42527	6.0241	1.27041	0.0747	1.36601	1004	15.8163	990	11.4	1059.5	26.9	1060	11.4	0.934403
X16km011_19.1	267	2.6	1.792	1.56592	5.7504	0.869505	0.0749	1.9073	1044	10.7143	1033.57	8.14	1064.9	37.6	1064.9	37.6	0.970579
X16km011_26.1	175.8	1.508	1.808	1.49562	5.8617	0.957443	0.0756	1.21477	1049	10.2041	1015.41	8.82	1083.6	23.9	1083.6	23.9	0.937071
X16km011_22	176	47.4	1.922	1.91127	5.4496	1.02985	0.0767	1.06431	1085	13.2653	1086.1	10.1	1112.5	20.8	1112.5	20.8	0.97627
X16km011_10.1	65.4	1.557	2.13	1.60487	5.0684	0.815376	0.0769	1.06154	1156	10.7143	1160.8	8.49	1117.7	20.8	1117.7	20.8	1.03856
X16km011_13	55	0.628	2.082	1.76439	5.1256	0.766461	0.0797	1.72842	1140	12.2449	1148.94	7.9	1188.7	33.4	1188.7	33.4	0.966552
X16km011_30.1	334	1.778	2.34	1.94052	4.9505	0.865713	0.0816	1.12545	1220	13.7755	1186.05	9.19	1235.1	21.6	1235.1	21.6	0.960287
X16km011_19.2	45.6	3.47	2.2	3.01484	5.1493	1.18899	0.0818	1.68405	1183	19.3878	1144.1	12.2	1239.9	32.3	1239.9	32.3	0.922736
X16km011_35.1	668	2.133	2.34	2.61643	5.1151	1.29668	0.0849	0.961515	1215	19.898	1151.1	13.4	1312.4	18.3	1312.4	18.3	0.877095
X16km011_16	85.9	1.205	2.739	1.50882	4.4484	0.917551	0.0883	1.15562	1341	12.2449	1307.2	10.6	1388.2	21.7	1388.2	21.7	0.941651
X16km011_10.2	145	1.066	2.74	2.42068	4.4326	1.02441	0.0896	2.44852	1331	18.8776	1311.4	11.9	1416.2	45.9	1416.2	45.9	0.925999
X16km011_30.2	583	1.07	2.58	2.9663	4.717	1.62244	0.0924	1.32521	1296	22.449	1239.5	17.9	1474.8	24.6	1474.8	24.6	0.840453
X16km011_28	1212	1.714	3.1	1.64582	4.2194	1.20919	0.0948	1.56075	1429	12.7551	1371.1	14.6	1523.3	28.8	1523.3	28.8	0.900085
X16km011_9.1	1020	1.285	3.98	1.5383	3.465	0.765674	0.0982	1.09107	1631	11.7347	1634.5	10.8	1589.4	20	1589.4	20	1.02838
X16km011_26.2	323	2.24	3.95	1.67915	3.5842	1.22419	0.1043	1.32076	1625	13.7755	1586.3	16.9	1701.2	23.8	1701.2	23.8	0.932459
X16km011_5.1	679	1.54	4.14	2.21828	3.6232	1.54897	0.1048	2.3855	1661	18.3673	1571.2	21.2	1710	43	1710	43	0.91883
X16km011_9.2	52.3	1.188	4.51	1.69691	3.1949	0.926221	0.1059	0.770847	1729	13.7755	1755.4	13.9	1729.2	13.9	1729.2	13.9	1.01515
X16km011_7.1	545	2.644	4.44	4.13679	3.367	1.9699	0.1069	1.62273	1723	28.5714	1676.4	28.5	1746.4	29.1	1746.4	29.1	0.959918
X16km011_37.2	161	1.298	4.54	1.57332	3.3557	0.973063	0.1071	1.3815	1734	12.7551	1681.4	14.1	1749.8	24.8	1749.8	24.8	0.96091
X16km011_34.1	174	0.5	4.3	1.89843	3.4843	1.27394	0.1075	1.04414	1688	15.8163	1626.5	17.9	1756.6	18.7	1756.6	18.7	0.925936
X16km011_4.2	96	1.99	4.62	1.65651	3.2258	1.02806	0.1079	1.41855	1749	13.7755	1740.7	15.4	1763.4	25.4	1763.4	25.4	0.987127
X16km011_7.2	650	1.33	4.52	2.25754	3.3557	1.52041	0.1093	1.49374	1740	16.8367	1681.4	22.1	1787	26.7	1787	26.7	0.940907
X16km011_25.1	380	1.127	5.11	4.89237	3.0675	2.49489	0.11	3.15399	1816	37.2449	1819	38.7	1798.6	56.2	1798.6	56.2	1.01134
X16km011_39	46.9	3.702	4.9	1.3536	3.1969	0.766048	0.1106	0.922611	1799	11.7347	1754.5	11.5	1808.5	16.4	1808.5	16.4	0.970141
X16km011_5.2	689	2.45	5.02	2.13432	3.0675	1.11438	0.1121	1.18335	1816	18.3673	1819	17.3	1832.9	21	1832.9	21	0.992416
X16km011_42	340	2.66	4.85	2.20913	3.1949	1.02204	0.1125	0.952381	1791	18.8776	1755.4	15.4	1839.4	16.9	1839.4	16.9	0.954333
X16km011_17.1	310	7.1	4.86	1.99463	3.2468	0.864273	0.1126	1.90307	1800	16.3265	1730.8	12.9	1841	33.8	1841	33.8	0.940141
X16km011_9.3	321	1.268	5	1.32653	3.0488	0.870199	0.1128	1.26646	1821	11.7347	1828.7	13.6	1844.2	22.5	1844.2	22.5	0.991595
X16km011_17.2	17.22	0.61	5.08	2.20955	3.1153	1.63774	0.114	1.20838	1838	17.3469	1794.6	25.1	1863.3	21.4	1863.3	21.4	0.96313
X16km011_5	98	1.33	5.8	3.34272	2.7548	1.85205	0.116	2.3311	1928	28.0612	1996.4	31.2	1894.7	41.1	1894.7	41.1	1.05368
X16km011_21.2	219	1.882	5.6	2.2777	2.8653	1.47792	0.1167	1.48646	1912	19.3878	1929.8	24.2	1905.5	26.2	1905.5	26.2	1.01275
X16km011_15	277	1.257	5.76	1.9487	2.849	1.02077	0.1195	1.40893	1946	15.3061	1939.4	16.8	1948	24.7	1948	24.7	0.995585
X16km011_35.2	299	1.91	5.92	1.72366	2.8818	0.8144	0.1217	1.13192	1958	15.3061	1920.3	13.3	1980.5	19.7	1980.5	19.7	0.969604
X16km011_32	844	0.891	5.76	1.68296	2.9674	0.911263	0.1241	1.39782	1935	15.3061	1872.2	14.5	2015.2	24.3	2015.2	24.3	0.929039
X16km011_27	38.5	3.7	5.94	1.54607	2.8736	0.816724	0.1256	1.54361	1962	13.7755	1925	13.3	2036.5	26.8	2036.5	26.8	0.945249
X16km011_24.2	153	4.08	6.67	2.44776	2.6525	1.23103	0.1266	1.53142	2057	21.4286	2062.3	21.3	2050.5	26.5	2050.5	26.5	1.00575
X16km011_7.3	397	2.03	7.45	1.50664	2.4155	1.07723	0.132	0.85034	2169	12.7551	2233.2	19.9	2124	14.6	2124	14.6	1.05141
X16km011_6.1	1880	1.356	5.45	3.93185	3.3113	1.69488	0.1332	1.99179	1890	31.1224	1701.2	24.8	2139.8	34.1	2139.8	34.1	0.795028
X16km011_23.1	81.7	1.281	7.28	3.22382	2.5974	1.53214	0.1344	1.82216	2159	31.6327	2099.6	26.9	2155.5	31.2	2155.5	31.2	0.974066
X16km011_3.1	466	2.43	9.8	3.22782	2.2989	1.6867	0.1651	2.56493	2419	28.0612	2328.2	32.3	2507.8	42.3	2507.8	42.3	0.928383
X16km011_25.2	469	1.74	9.45	3.07742	2.4631	1.57426	0.1689	1.23851	2360	33.1633	2196.6	28.7	2546	20.3	2546	20.3	0.862765
X16km011_12.1	385	8.18	11.68	1.4415	2.0202	0.909185	0.1708	0.866272	2575	13.7755	2592.3	19	2564.7	14.2	2564.7	14.2	1.01076
X16km011_3.2	458	2.006	11.64	1.53412	2.079	1.17796	0.1729	1.18034	2571	15.3061	2531.6	24.2	2585.2	19.3	2585.2	19.3	0.979267
X16km011_31	144.7	1.155	10.52	1.30946	2.2727	0.718376	0.1753	0.960453	2478	12.2449	2350.7	13.9	2608.2	15.7	2608.2	15.7	0.901273
X16km011_12.2	270	0.853	11.92	1.92611	2.0921	1.12181	0.1823	1.31539	2589	18.8776	2518.5	22.9	2673.2	21.3	2673.2	21.3	0.942129
X16km011_41	33.3	0.821	12.91	1.5808	2	0.714286	0.1853	0.90862	2673	14.2857	2613.8	15	2700.1	14.7	2700.1	14.7	0.968038
X16km011_34.2	690	21	12.67	1.48994	2.0408	0.925007	0.1856	0.907152	2662	14.7959	2570.7	19.2	2702.8	14.7	2702.8	14.7	0.951125
X16km011_11	870	1.148	13.17	1.74329	1.912	1.014	0.1858	1.31807	2686	16.8367	2711.9	22	2704.6	21.3	2704.6	21.3	1.0027
X16km011_6.2	940	0.751	13.69	1.56527	1.9011	0.966143	0.1896	1.31857	2729	15.3061	2724.6	21	2738	21.3	2738	21.3	0.995106
X16km011_38	78.6	1.524	13.24	1.50287	2.0161	0.759195	0.1903	0.911557	2702	15.3061	2596.6	15.9	2744	14.7	2744	14.7	0.946283
X16km011_23.2	134	0.818	22.14	1.72833	1.5456	0.957293	0.2529	1.1701	3196	16.8367	3216.5	23.8	3202.3	18.1	3202.3	18.1	1.00443
¶ Data not corrected for common-Pb.
† 206Pb/238U ages common lead corrected by inferring the initial Pb-composition from the Stacey and Kramers (1975) two stage isotope evolution model (Vermeesch, 2018a). Analyses with greater than 10% uncertainty in 207/206 age (1-sigma) or 5% uncertainty in 206/238 age (1-sigma) are excluded. Ages >600 Ma with >20% discordance and/or 5% reverse discordance are excluded. Accepted ages calculated u…
§ Calculated based on 206Pb/238U age vs. 207Pb/206Pb age.
Sample: Galice Formation 12TL041; analyzed at USC			Isotope Ratios¶						Apparent Ages¶
Analysis	U	U/Th	207Pb	± 1-sigma	238U	± 1-sigma	207Pb	± 1-sigma	207Pb	± 1-sigma	206Pb	± 1-sigma	207Pb	± 1-sigma	Best age†	± 1-sigma	Conc.§
	(ppm)		235U	(%)	206Pb	(%)	206Pb	(%)	235U	(Ma)	238U	(Ma)	206Pb	(Ma)	(Ma)	(Ma)	(%)
JAR_14003_105	155.3	3.05	0.18	7.65306	43.2339	2.42639	0.0593	8.4317	166	12.7041	147.4	3.5765	380	32.0405	145.5	3.5	0.387895
JAR_14003_64	186.6	1.573	0.1693	3.31497	43.592	2.44649	0.0521	3.03576	158.5	5.25423	146.2	3.57677	301	9.13765	145.6	3.5	0.485714
JAR_14003_85	187.9	1.81	0.188	5.4277	43.1593	2.4222	0.0602	6.27161	174	9.4442	147.6	3.57517	500	31.3581	145.6	3.4	0.2952
JAR_14003_4	383	1.97	0.165	3.40136	43.4783	2.44011	0.0529	2.98985	156.4	5.31973	146.6	3.5772	300	8.96956	145.9	3.5	0.488667
JAR_14003_48	350	2.06	0.171	3.28201	43.3088	2.4306	0.0522	3.22543	159.9	5.24794	147.1	3.57541	270	8.70866	146.6	3.5	0.544815
JAR_14003_1	355	2.11	0.1595	3.19877	42.8633	2.40559	0.0496	2.98305	150	4.79816	148.6	3.57471	170	5.07118	148.6	3.5	0.874118
JAR_14003_15	292.8	2.74	0.1604	3.05359	42.7168	2.39737	0.0497	2.87439	153.4	4.68421	149.2	3.57688	160	4.59902	149	3.5	0.9325
JAR_14003_84	601	5.4	0.1795	3.1266	42.3729	2.01055	0.0549	3.15973	167.3	5.2308	150.4	3.02387	370	11.691	149.3	2.9	0.406486
JAR_14003_93	227	2.36	0.1606	3.49455	42.3729	2.16188	0.0488	3.45015	150.9	5.27327	150.3	3.24931	140	4.83021	150.4	3.1	1.07357
JAR_14003_100	91.5	2.89	0.192	7.44048	41.632	2.33649	0.0602	7.96664	176	13.0952	153	3.57483	480	38.2399	150.9	3.4	0.31875
JAR_14003_101	209.3	2.87	0.185	5.51572	41.7537	2.34332	0.0559	4.65481	171	9.43188	152.5	3.57356	380	17.6883	151.3	3.4	0.401316
JAR_14003_53	339	2.519	0.177	3.74726	41.3394	2.32007	0.0535	3.52851	165	6.18298	154.1	3.57523	340	11.9969	153.2	3.4	0.453235
JAR_14003_107	656	2.23	0.176	3.76855	41.3053	2.31815	0.0533	3.54175	164	6.18043	154.2	3.57459	300	10.6253	153.4	3.4	0.514
JAR_14003_8	722	2.92	0.1577	2.97646	41.3736	2.32199	0.047	3.03951	149.7	4.45576	154	3.57586	80	2.43161	154.4	3.5	1.925
JAR_14003_81	212.6	2.104	0.174	3.51865	41.0846	2.09615	0.0522	3.42091	162.1	5.70373	155	3.24904	270	9.23645	154.4	3.1	0.574074
JAR_14003_78	204.7	2.179	0.157	3.89965	41.3223	2.00287	0.0474	3.87497	147.4	5.74808	154.1	3.08642	100	3.87497	154.5	3	1.541
JAR_14003_37	464	1.863	0.1606	2.98625	41.1862	2.31147	0.0478	2.66843	151	4.50924	154.6	3.57353	111	2.96196	154.9	3.4	1.39279
JAR_14003_51	406	3.78	0.1692	2.80431	40.8497	2.08417	0.05	2.65306	158.5	4.44484	155.9	3.24922	187	4.96122	155.7	3.2	0.83369
JAR_14003_24	371	2.012	0.183	3.6244	40.6669	2.28233	0.0537	3.32535	171.5	6.21585	156.6	3.57413	330	10.9737	155.7	3.5	0.474545
JAR_14003_39	578	3.42	0.166	3.04278	40.833	2.08332	0.0497	2.87439	155.7	4.73761	156	3.24997	172	4.94395	155.9	3.2	0.906977
JAR_14003_55	727	0.866	0.18	3.68481	40.4204	2.26849	0.0537	3.42036	167.2	6.161	157.6	3.57514	320	10.9452	156.7	3.4	0.4925
JAR_14003_66	2427	2.578	0.1832	2.50646	40.3551	2.05893	0.0539	2.08247	170.7	4.27853	157.8	3.249	358	7.45523	156.9	3.1	0.440782
JAR_14003_69	476	2.518	0.1712	2.98016	40.4695	2.06477	0.0501	2.85144	160.2	4.77422	157.3	3.24788	190	5.41774	157.2	3.1	0.827895
JAR_14003_61	1104	2.157	0.1681	2.4888	40.3389	2.26391	0.0487	2.40959	157.6	3.92235	157.8	3.57246	134	3.22885	158	3.4	1.17761
JAR_14003_113	608	2.36	0.18	3.40136	40	2.85714	0.0548	3.72412	167.6	5.70068	159.1	4.54571	370	13.7792	158.1	4.4	0.43
JAR_14003_97	159	1.76	0.163	4.06911	40.1445	2.45783	0.0476	3.7515	153	6.22574	158.6	3.89811	110	4.12665	158.9	3.8	1.44182
JAR_14003_47	608	2.99	0.1816	2.44426	39.9361	2.24131	0.0519	2.65424	169.3	4.13813	159.4	3.57265	261	6.92757	158.9	3.5	0.610728
JAR_14003_43	175	2.82	0.1747	3.2125	39.8883	1.97406	0.0509	3.20757	163.1	5.23959	159.6	3.15061	260	8.33968	159.3	3.1	0.613846
JAR_14003_22	1530	1.29	0.194	3.94488	39.6825	2.83447	0.0542	3.20054	180	7.10078	160.2	4.54082	390	12.4821	159.5	4.4	0.410769
JAR_14003_124	487	1.905	0.1723	3.25725	39.7773	2.63829	0.0505	3.13195	161.2	5.25069	160.1	4.2239	200	6.26389	159.8	4.1	0.8005
JAR_14003_129	178	1.6	0.256	7.17474	38.3	2.55102	0.073	6.93878	228	16.3584	166.1	4.21939	840	58.2857	161.3	4	0.197738
JAR_14003_26	187	2	0.31	6.08953	37.807	2.5	0.0828	4.84694	271	16.5026	168.3	4.2075	1180	57.1939	161.3	3.9	0.142627
JAR_14003_104	810	2.56	0.197	3.36683	39.0625	2.59088	0.0563	3.26241	182.2	6.13436	162.8	4.21795	430	14.0283	161.5	4.1	0.378605
JAR_14003_40	53.8	2.113	0.194	6.83779	38.9712	2.38599	0.055	6.86456	178	12.1713	163.3	3.89632	320	21.9666	162.2	3.8	0.510312
JAR_14003_75	1030	2.63	0.1668	2.96701	39.2311	2.60206	0.0486	2.41455	156.4	4.64041	162.2	4.22054	127	3.06647	162.4	4.1	1.27717
JAR_14003_127	254	2.5	0.328	6.37755	37.175	2.65306	0.09	6.22449	284	18.1122	171.3	4.54469	1330	82.7857	162.5	4.2	0.128797
JAR_14003_116	246.8	1.47	0.187	3.54687	39.0016	2.18886	0.0523	3.60947	173.2	6.14318	163.2	3.57222	300	10.8284	162.6	3.5	0.544
JAR_14003_54	919	3.088	0.1778	2.61128	38.9105	2.18375	0.0506	2.11745	166	4.33473	163.5	3.57044	215	4.55251	163.3	3.5	0.760465
JAR_14003_72	265	3.08	0.1762	3.18516	38.8048	2.17782	0.0493	3.31167	164.4	5.2364	164	3.57163	160	5.29867	164	3.5	1.025
JAR_14003_121	404	2.1	0.1671	3.35861	38.85	2.37857	0.048	3.40136	156.6	5.25959	163.8	3.8961	100	3.40136	164.1	3.8	1.638
JAR_14003_92	1282	2.04	0.171	2.8643	38.8048	2.3758	0.048	2.65731	160.1	4.58575	164	3.89632	104	2.76361	164.3	3.8	1.57692
JAR_14003_130	429	2.45	0.1722	2.96286	38.7147	2.56781	0.048	2.65731	161	4.7702	164.4	4.22148	116	3.08248	164.7	4.1	1.41724
JAR_14003_59	652	2.5	0.195	3.40136	38.1971	1.94883	0.0533	3.15886	180.6	6.14286	166.6	3.24675	310	9.79247	165.8	3.1	0.537419
JAR_14003_71	438	2.332	0.171	3.58038	38.432	2.1569	0.0481	3.28822	160.2	5.73577	165.6	3.57182	100	3.28822	165.9	3.4	1.656
JAR_14003_109	196	1.505	0.191	5.07533	38.1388	2.52962	0.0523	4.29235	176	8.93258	166.9	4.22193	270	11.5893	166.2	4.1	0.618148
JAR_14003_28	828	1.591	0.1859	2.71706	38.0373	2.52288	0.0507	2.2139	174.2	4.73312	167.3	4.22078	220	4.87059	167	4	0.760455
JAR_14003_87	126	5.52	0.209	7.56762	37.5516	2.49067	0.057	8.95095	190	14.3785	169.4	4.21919	260	23.2725	167.8	4.1	0.651538
JAR_14003_52	233	2.605	0.186	4.38885	37.6223	2.3034	0.0518	4.13679	173	7.59271	169.1	3.89506	240	9.9283	168.6	3.7	0.704583
JAR_14003_33	68.8	1.932	0.276	4.06684	36.523	2.42244	0.0719	4.04473	246	10.0044	175	4.23928	940	38.0205	169.3	3.9	0.18617
JAR_14003_106	481	1.673	0.1911	2.93681	37.4111	2.29048	0.0516	2.76855	177.2	5.20403	170	3.89381	251	6.94906	169.6	3.8	0.677291
JAR_14003_119	280	2.89	0.185	3.861	37.4672	2.48507	0.05	3.46939	171	6.60232	169.8	4.21965	180	6.2449	169.7	4.1	0.943333
JAR_14003_10	313	2.11	0.313	7.00919	35.9195	2.19916	0.0794	5.71891	272	19.065	177	3.89251	1130	64.6237	170.5	3.6	0.156637
JAR_14003_18	1005	2.1	0.1807	2.34349	37.2856	2.28279	0.0486	2.20459	168.6	3.95113	170.6	3.89444	130	2.86596	170.8	3.8	1.31231
JAR_14003_9	297	1.647	0.183	3.6244	36.7377	2.24925	0.0477	2.88795	169.8	6.15423	173.1	3.89345	93	2.68579	173.5	3.8	1.86129
JAR_14003_56	183.3	1.95	0.206	3.96275	36.4299	2.41627	0.0543	3.75841	190	7.52923	174.6	4.2188	340	12.7786	173.5	4	0.513529
JAR_14003_120	1040	1.48	0.186	3.29164	36.3636	2.78293	0.0493	3.41516	172.7	5.68466	175	4.87013	150	5.12274	174.9	4.7	1.16667
JAR_14003_88	1710	1.506	0.2015	3.03844	35.7526	2.37135	0.0522	2.54125	186	5.65149	177.8	4.21625	292	7.42044	177.3	4	0.608904
JAR_14003_49	260	3.45	0.227	3.59615	35.0754	1.96852	0.0586	3.91795	207	7.44403	181.2	3.56695	530	20.7651	179.2	3.4	0.341887
JAR_14003_7	127.8	1.928	0.191	3.73972	35.4108	2.34867	0.0482	4.02236	177	6.6193	179.5	4.21587	130	5.22906	179.9	4.1	1.38077
JAR_14003_110	546	2.53	0.202	3.03092	34.965	2.85429	0.0508	2.41041	186.8	5.66175	181.5	5.18053	255	6.14655	181.5	5	0.711765
JAR_14003_114	369	1.614	0.21	4.61613	34.6741	2.47672	0.0532	4.89105	193	8.90914	183.3	4.53983	270	13.2058	182.5	4.4	0.678889
JAR_14003_45	3820	3.29	0.2085	2.44702	34.4828	2.46305	0.0522	2.05255	192.1	4.70073	183.9	4.52956	293	6.01396	183.7	4.3	0.627645
JAR_14003_118	130	1.584	0.21	6.07386	34.4828	2.63899	0.0512	6.0786	191	11.6011	184.3	4.86365	240	14.5886	184	4.7	0.767917
JAR_14003_63	306	2.784	0.214	3.09937	33.0142	2.18972	0.0502	2.84576	196.4	6.08716	192.3	4.21083	220	6.26067	192.3	4.1	0.874091
JAR_14003_58	264	1.623	0.235	4.55927	32.7869	2.5092	0.0553	4.05949	213	9.71125	193.5	4.8553	370	15.0201	192.4	4.6	0.522973
JAR_14003_32	166.8	2.137	0.222	3.90697	32.8299	2.1775	0.0526	3.87988	203	7.93115	193.4	4.21128	270	10.4757	192.8	4.1	0.716296
JAR_14003_13	154.7	1.757	0.222	3.2175	31.8471	2.43728	0.0507	3.62275	203.1	6.53475	199.4	4.85994	230	8.33233	199.2	4.7	0.866957
JAR_14003_42	236	1.372	0.232	3.07882	31.6957	2.10227	0.053	3.36927	211	6.49631	200.2	4.20874	300	10.1078	199.5	4	0.667333
JAR_14003_77	529	2.78	0.23	3.10559	31.1527	2.70202	0.0513	2.98365	209.9	6.51863	203.6	5.5013	240	7.16076	203.4	5.3	0.848333
JAR_14003_25	229	2.032	0.252	3.03693	30.8642	2.51953	0.057	3.58038	228	6.9242	205.4	5.17511	440	15.7537	203.8	4.9	0.466818
JAR_14003_67	1603	5.84	0.225	2.1542	31.0945	2.06239	0.05026	1.82723	206	4.43764	204	4.20728	202	3.69101	204	4	1.0099
JAR_14003_98	169	3.027	0.248	5.9661	30.7031	2.34973	0.0548	5.39997	223	13.3044	206.6	4.85454	320	17.2799	205.5	4.7	0.645625
JAR_14003_11	251	1.709	0.271	3.76534	30.03	2.45143	0.0595	3.68719	243	9.14979	210.9	5.17007	580	21.3857	208.8	4.9	0.363621
JAR_14003_96	403	2.22	0.2327	2.8503	30.2572	2.16123	0.0508	2.61128	212.1	6.04549	209.6	4.52993	223	5.82316	209.5	4.3	0.93991
JAR_14003_16	136.1	2.76	0.22	3.94249	30.1205	2.45881	0.0488	4.07745	204	8.04267	210.2	5.16843	150	6.11618	211	5	1.40133
JAR_14003_70	613	2.185	0.266	3.45251	29.7	2.12143	0.0578	3.35428	239	8.2515	213.5	4.52925	480	16.1006	211.5	4.4	0.444792
JAR_14003_99	184	3.78	0.242	2.95159	29.5858	2.41517	0.0516	2.86743	219.4	6.4758	214.5	5.18053	260	7.45531	214	4.9	0.825
JAR_14003_19	170.5	2.93	0.227	3.37139	29.5858	2.41517	0.0496	3.29164	211	7.11364	214.2	5.17329	190	6.25411	214.5	5	1.12737
JAR_14003_46	50.9	3.5	0.298	10.4438	28.169	2.58695	0.0559	7.02786	242	25.2739	224.5	5.8077	320	22.4891	223.4	5.6	0.701562
JAR_14003_41	47.3	4.61	0.266	5.56238	27.7008	2.40262	0.0534	4.87274	238	13.2385	228.4	5.48759	290	14.1309	227.9	5.3	0.787586
JAR_14003_5	48.6	2.69	0.256	4.38457	27.248	2.7804	0.0506	4.2349	230	10.0845	233	6.47834	200	8.46979	232.4	6.2	1.165
JAR_14003_29	59.5	7.28	0.293	5.22393	26.9542	2.88795	0.056	5.46647	263	13.7389	235	6.78668	410	22.4125	233.4	6.5	0.573171
JAR_14003_57	97.1	4.46	0.286	4.10304	26.9542	2.75043	0.055	4.08163	254	10.4217	234.8	6.458	360	14.6939	233.6	6.2	0.652222
JAR_14003_23	684	1.36	0.291	3.85721	26.8817	3.29164	0.0569	3.13834	258	9.95161	236	7.76827	500	15.6917	233.7	7.5	0.472
JAR_14003_6	75	2.06	0.288	5.66893	26.8817	3.84025	0.0565	5.32779	259	14.6825	235	9.02458	430	22.9095	233.8	8.6	0.546512
JAR_14003_95	115.4	2.347	0.302	4.0546	26.8097	2.32533	0.0585	4.18629	267	10.8258	235.8	5.48312	490	20.5128	233.9	5.3	0.481224
JAR_14003_2	121.7	3.97	0.247	3.51153	26.9542	2.61291	0.0477	3.31579	224	7.86582	234.7	6.13249	110	3.64737	235.8	5.9	2.13364
JAR_14003_94	81.3	8.83	0.263	4.26787	26.5957	2.44247	0.0496	3.90882	236	10.0722	239.3	5.84482	160	6.25411	238.3	5.6	1.49562
JAR_14003_50	547	0.815	0.269	2.46567	26.1097	2.26461	0.0514	2.38228	241.6	5.95706	242.3	5.48716	259	6.17009	242.2	5.2	0.935521
JAR_14003_20	76.5	3.28	0.26	4.51334	26.0417	2.79018	0.0502	4.67518	233	10.5161	242.7	6.77176	180	8.41532	243.2	6.6	1.34833
JAR_14003_38	26.6	7.89	0.316	7.74994	25.5102	3.25385	0.0576	6.55471	279	21.6223	248	8.06955	400	26.2188	245.9	7.7	0.62
JAR_14003_131	513	2.464	0.272	3.18878	24.7586	2.14743	0.05	2.65306	247	7.87628	255.2	5.48024	184	4.88163	255.7	5.3	1.38696
JAR_14003_44	140.6	1.12	0.29	3.87051	23.753	2.54496	0.0491	3.7408	257	9.94722	267.1	6.79759	140	5.23713	266.6	6.5	1.90786
JAR_14003_36	768	2.57	0.439	3.13793	20.5761	2.30957	0.0649	2.67287	369	11.579	305.6	7.05803	754	20.1535	301.3	6.6	0.405305
JAR_14003_108	306	0.773	0.367	3.89257	20.3252	2.5925	0.0543	3.28861	316	12.3005	309	8.01083	350	11.5101	309	7.7	0.882857
JAR_14003_102	198	1.043	0.449	3.6362	17.5131	2.23382	0.0577	3.80221	375	13.6357	357.9	7.99484	470	17.8704	356.2	7.6	0.761489
JAR_14003_79	349	0.975	0.52	2.74725	14.9031	2.28109	0.0559	2.46431	424	11.6484	418	9.53496	446	10.9908	418.3	9.1	0.93722
JAR_14003_74	326	1.758	0.686	2.37996	11.3636	2.20315	0.0584	2.00937	532	12.6614	544	11.9852	539	10.8305	544	11	1.00928
JAR_14003_27	59.2	1.178	0.83	3.74969	10.1833	2.49387	0.0611	3.59063	610	22.8731	604	15.063	600	21.5438	603	14	1.00667
JAR_14003_60	460	1.365	0.902	2.88475	9.12409	2.37412	0.0616	2.56759	650	18.7508	670	15.9066	669	17.1771	671	15	1.00149
JAR_14003_82	478	0.976	0.96	2.39158	8.84956	2.07694	0.0625	2.12245	682	16.3106	690	14.3309	694	14.7298	690	13	0.994236
JAR_14003_65	50.16	1.802	1.7	2.37095	5.90667	2.04925	0.073	2.16662	1006	23.8517	1008	20.6565	1001	21.6879	1001	21.6879	1.00699
JAR_14003_103	72.6	0.899	1.822	2.71623	5.58659	2.16623	0.0739	2.34735	1055	28.6563	1061	22.9837	1024	24.0369	1024	24.0369	1.03613
JAR_14003_86	168	2.05	1.649	2.66086	6.04961	2.59269	0.0734	2.15481	987	26.2627	985	25.538	1044	22.4962	1044	22.4962	0.943487
JAR_14003_89	514	3.22	1.738	2.7888	6.16523	2.3906	0.0779	2.29232	1019	28.4179	969	23.1649	1144	26.2241	1144	26.2241	0.847028
JAR_14003_111	107	1.813	2.17	3.29164	5.07614	2.56397	0.0791	2.58005	1165	38.3476	1158	29.6908	1155	29.7995	1155	29.7995	1.0026
JAR_14003_62	200.2	5.39	2.03	2.21172	5.42888	2.18817	0.0792	2.19027	1124	24.8598	1089	23.8292	1168	25.5824	1168	25.5824	0.932363
JAR_14003_115	347	2.8	2.4	3.61395	4.68604	2.62992	0.083	3.01205	1249	45.1382	1246	32.7688	1240	37.3494	1240	37.3494	1.00484
JAR_14003_76	151	2.147	2.85	2.50627	4.19463	2.35413	0.0858	2.31911	1370	34.3358	1377	32.4164	1353	31.3776	1353	31.3776	1.01774
JAR_14003_12	402	3.14	2.6	2.94349	4.63822	2.60308	0.0881	2.54812	1313	38.648	1258	32.7468	1390	35.4189	1390	35.4189	0.905036
JAR_14003_112	346	1.59	3.11	3.117	4.04695	2.6842	0.091	2.80332	1427	44.4796	1422	38.1693	1424	39.9193	1424	39.9193	0.998596
JAR_14003_21	552	0.922	3	2.89116	4.16667	2.33843	0.0925	2.53723	1401	40.5051	1386	32.4107	1461	37.0689	1461	37.0689	0.948665
JAR_14003_90	99.6	1.95	4.81	3.18215	3.07692	2.35479	0.1085	2.58629	1785	56.8013	1823	42.9278	1770	45.7773	1770	45.7773	1.02994
JAR_14003_126	664	1.181	11.05	2.1701	2	2.2449	0.1639	2.08564	2525	54.795	2612	58.6367	2489	51.9116	2489	51.9116	1.04942
JAR_14003_68	62.3	2.718	12.61	2.38716	1.94552	2.18375	0.181	2.00135	2646	63.1642	2671	58.328	2657	53.1759	2657	53.1759	1.00527
¶ Data not corrected for common-Pb.
† 206Pb/238U ages common lead corrected by inferring the initial Pb-composition from the Stacey and Kramers (1975) two stage isotope evolution model (Vermeesch, 2018a). Analyses with greater than 10% uncertainty in 207/206 age (1-sigma) or 5% uncertainty in 206/238 age (1-sigma) are excluded. Ages >600 Ma with >20% discordance and/or 5% reverse discordance are excluded. Accepted ages calculated u…
§ Calculated based on 206Pb/238U age vs. 207Pb/206Pb age.
Decay constants: 235U = 9.8485E-10/yr, 238U = 1.55125E-10/yr; 238U/235U = 137.818
Uncertainties quoted without components related to systematic error unless otherwise stated. Total systematic uncertainties (sys): 206Pb/238U = 4.1%; 207Pb/206Pb = 2.1%
Systematic uncertainties include excess variance determined from long-term repeated analyses of Plesovice (206Pb/238U = 4.1%, 207Pb/206Pb = 2.1%); decay constant uncertainties (238U: 0.11%, 235U: 0.012%); and 91500 reference value uncertainties (Wiedenbeck et al., 1995).
Sample: Galice Formation 15KM50; analyzed at ALC			Isotope Ratios						Apparent Ages
Analysis	U	U/Th	207Pb*	± 1-sigma	238U	± 1-sigma	207Pb*	± 1-sigma	207Pb*	± 1-sigma	206Pb*	± 1-sigma	207Pb*	± 1-sigma	Best age†	± 1-sigma	Conc.§
	(ppm)		235U	(%)	206Pb*	(%)	206Pb*	(%)	235U	(Ma)	238U	(Ma)	206Pb*	(Ma)	(Ma)	(Ma)	(%)
-15KM50 Spot 66	88.5786	1.53491	0.135721	6.45173	42.1028	2.80152	0.0414436	5.81173	129.226	7.82872	151.321	4.18994	260.217	147.467	151.321	4.18994	0.581521
-15KM50 Spot 28	251.763	2.81232	0.158273	4.48465	41.9299	4.00677	0.0481315	2.01442	149.19	6.22243	151.938	6.01662	105.714	47.5933	151.938	6.01662	1.43726
-15KM50 Spot 94	845.033	2.73497	0.160186	2.8026	41.3937	2.56049	0.0480902	1.1395	150.866	3.92906	153.883	3.89349	103.688	26.9386	153.883	3.89349	1.4841
-15KM50 Spot 100	198.624	2.20896	0.152575	3.56845	41.1584	3.12217	0.0455449	1.72797	144.183	4.79652	154.752	4.7741	26.3922	41.8643	154.752	4.7741	5.86354
-15KM50 Spot 110	288.33	2.58534	0.166583	3.13837	40.8984	2.73404	0.0494124	1.54089	156.449	4.55042	155.724	4.20655	167.421	35.9934	155.724	4.20655	0.930135
-15KM50 Spot 91	153.783	3.50414	0.157014	3.75008	40.8391	3.19281	0.0465063	1.96699	148.086	5.16741	155.948	4.91937	23.9475	47.1787	155.948	4.91937	6.51207
-15KM50 Spot 17	444.787	2.2052	0.162403	3.52437	40.7419	3.256	0.0479881	1.34896	152.804	4.99979	156.315	5.0284	98.6951	31.9232	156.315	5.0284	1.58382
-15KM50 Spot 46	761.672	2.4575	0.1714	2.39775	40.5668	2.13767	0.050429	1.08609	160.633	3.5624	156.982	3.31522	214.818	25.1639	156.982	3.31522	0.730766
-15KM50 Spot 14	247.624	1.89243	0.177697	3.4308	40.384	2.81324	0.0520461	1.9637	166.077	5.25625	157.684	4.3822	287.457	44.8895	157.684	4.3822	0.548547
-15KM50 Spot 56	140.021	2.19559	0.158683	4.31412	40.3314	2.94797	0.0464164	3.14978	149.549	5.99919	157.887	4.59793	19.3272	75.6487	157.887	4.59793	8.16914
-15KM50 Spot 79	225.531	2.68578	0.166818	3.1718	40.293	2.64525	0.0487496	1.75014	156.653	4.60446	158.035	4.1296	135.803	41.116	158.035	4.1296	1.16371
-15KM50 Spot 51	281.998	2.37709	0.165269	3.47943	40.2654	3.14154	0.0482639	1.4957	155.305	5.01079	158.142	4.90766	112.249	35.3248	158.142	4.90766	1.40886
-15KM50 Spot 96	243.494	2.54867	0.159759	4.77095	39.814	3.54395	0.0461317	3.19412	150.492	6.67327	159.913	5.59753	4.51051	76.9196	159.913	5.59753	35.4535
-15KM50 Spot 30	80.3066	2.89836	0.162166	4.73018	39.81	4.14474	0.0468221	2.27941	152.597	6.70201	159.929	6.54709	40.1857	54.5214	159.929	6.54709	3.97975
-15KM50 Spot 11	325.021	3.08146	0.158626	3.43015	39.6946	2.95178	0.0456673	1.74726	149.5	4.76845	160.388	4.6759	19.8953	42.2679	160.388	4.6759	8.06162
-15KM50 Spot 23	481.688	3.67411	0.173982	2.85599	39.2549	2.56607	0.0495332	1.25379	162.869	4.29766	162.162	4.1093	173.124	29.2657	162.162	4.1093	0.936685
-15KM50 Spot 67	372.29	2.04982	0.17718	3.88205	38.7141	3.66353	0.0497488	1.28409	165.631	5.93292	164.399	5.94667	183.25	29.9036	164.399	5.94667	0.897129
-15KM50 Spot 85	288.199	4.65509	0.169665	2.92085	38.3975	2.54568	0.0472493	1.43209	159.128	4.30203	165.737	4.16537	61.8668	34.1032	165.737	4.16537	2.67894
-15KM50 Spot 45	455.935	1.59393	0.186925	3.82994	37.4813	3.0141	0.0508137	2.36298	174.002	6.12451	169.736	5.04924	232.367	54.5807	169.736	5.04924	0.730465
-15KM50 Spot 35	282.029	1.36155	0.176577	4.27419	36.4419	2.85221	0.0466696	3.18333	165.111	6.51333	174.512	4.91068	32.3487	76.2734	174.512	4.91068	5.39473
-15KM50 Spot 105	182.322	2.09013	0.192978	3.05303	35.0046	2.65817	0.0489927	1.50171	179.167	5.01464	181.578	4.7593	147.482	35.2005	181.578	4.7593	1.23119
-15KM50 Spot 33	410.75	2.40181	0.193406	3.17041	34.4283	2.6136	0.0482929	1.79461	179.531	5.21712	184.574	4.75561	113.639	42.3595	184.574	4.75561	1.62421
-15KM50 Spot 83	99.5465	2.45994	0.201886	4.19044	33.7727	3.81829	0.0494506	1.7264	186.721	7.14728	188.105	7.07864	169.227	40.3066	188.105	7.07864	1.11155
-15KM50 Spot 59	221.406	2.33462	0.21033	3.29932	32.5399	3.11102	0.0496381	1.09868	193.829	5.82179	195.125	5.97943	178.061	25.5966	195.125	5.97943	1.09583
-15KM50 Spot 3	345.763	3.0084	0.213297	3.03324	32.1204	2.77572	0.0496895	1.22308	196.316	5.41451	197.634	5.40255	180.473	28.4864	197.634	5.40255	1.09509
-15KM50 Spot 99	222.963	2.71858	0.2389	3.29761	30.4258	2.96481	0.0527176	1.44366	217.519	6.45675	208.466	6.08175	316.64	32.8426	208.466	6.08175	0.65837
-15KM50 Spot 68	140.06	1.25645	0.243362	3.51412	28.5231	3.07445	0.0503439	1.702	221.169	6.98407	222.135	6.71313	210.898	39.4488	222.135	6.71313	1.05329
-15KM50 Spot 32	1250.56	33.2802	0.255792	2.50857	27.3216	2.27837	0.0506865	1.04974	231.27	5.18834	231.73	5.1859	226.605	24.2548	231.73	5.1859	1.02262
-15KM50 Spot 22	90.3635	4.01707	0.234998	4.58416	27.1817	3.94748	0.0463276	2.33065	214.316	8.85725	232.902	9.02964	14.6819	56.0181	232.902	9.02964	15.8631
-15KM50 Spot 60	366.946	1.6223	0.26847	3.08945	25.6696	2.85494	0.049982	1.18068	241.47	6.63946	246.363	6.9008	194.178	27.4708	246.363	6.9008	1.26875
-15KM50 Spot 38	207.271	2.64433	0.295819	3.33116	24.5665	2.90688	0.0527071	1.62687	263.13	7.72176	257.206	7.32949	316.188	36.9901	257.206	7.32949	0.81346
-15KM50 Spot 54	502.324	1.73709	0.319427	3.05916	22.3447	2.81054	0.0517661	1.20804	281.462	7.52016	282.229	7.76102	275.071	27.6649	282.229	7.76102	1.02602
-15KM50 Spot 26	592.54	0.924737	0.324424	3.20173	22.1445	2.97282	0.0521046	1.18888	285.3	7.9636	284.726	8.28018	290.001	27.1487	284.726	8.28018	0.98181
-15KM50 Spot 39	1343.28	5.43463	0.332651	2.94883	21.6582	2.77309	0.052253	1.00278	291.588	7.47412	290.976	7.88962	296.489	22.9073	290.976	7.88962	0.981403
-15KM50 Spot 88	545.694	3.43526	0.354079	2.61358	20.8124	2.35275	0.0534466	1.13815	307.784	6.93951	302.528	6.95329	347.785	25.7156	302.528	6.95329	0.869872
-15KM50 Spot 81	511.928	1.66099	0.359856	2.97065	19.9167	2.76821	0.0519811	1.07786	312.107	7.98227	315.805	8.53148	284.576	24.6598	315.805	8.53148	1.10974
-15KM50 Spot 52	787.366	2.85319	0.459467	2.74736	16.404	2.60009	0.0546642	0.88744	383.887	8.78248	381.466	9.6307	398.491	19.8901	381.466	9.6307	0.957275
-15KM50 Spot 82	172.378	2.84071	0.50249	2.84943	15.1805	2.70593	0.0553238	0.892851	413.386	9.67646	411.25	10.7806	425.312	19.9175	411.25	10.7806	0.966935
-15KM50 Spot 53	226.6	2.21315	0.524642	3.348	14.7353	3.17798	0.0560687	1.05335	428.248	11.6985	423.276	13.0195	455.081	23.3769	423.276	13.0195	0.93011
-15KM50 Spot 61	1646.58	3.82971	0.516004	2.77369	14.7267	2.57153	0.0551134	1.03953	422.478	9.58636	423.515	10.5408	416.805	23.2237	423.515	10.5408	1.0161
-15KM50 Spot 107	161.501	2.83742	0.609973	3.54066	12.7599	3.34098	0.056449	1.17224	483.543	13.6217	486.389	15.6523	470.053	25.9664	486.389	15.6523	1.03475
-15KM50 Spot 50	153.595	2.87389	0.656959	3.82	11.9953	3.60287	0.0571543	1.26954	512.752	15.3799	516.182	17.8723	497.509	27.9514	516.182	17.8723	1.03753
-15KM50 Spot 78	409.812	1.42051	0.78394	2.87411	10.4792	2.74433	0.0595813	0.85391	587.729	12.8251	587.554	15.4115	588.381	18.504	587.554	15.4115	0.998595
-15KM50 Spot 74	65.4399	2.78757	0.804103	3.56841	10.1799	3.34825	0.0593683	1.234	599.141	16.1507	604.044	19.3063	580.634	26.793	604.044	19.3063	1.04032
-15KM50 Spot 93	309.126	1.50548	0.825857	2.73099	9.95899	2.46041	0.0596512	1.18519	611.311	12.5433	616.821	14.4729	590.924	25.7005	616.821	14.4729	1.04382
-15KM50 Spot 40	346.551	4.20491	0.884989	2.84522	9.55602	2.58966	0.0613358	1.17852	643.674	13.5644	641.579	15.8147	651.028	25.3209	641.579	15.8147	0.985486
-15KM50 Spot 42	545.57	4.85992	1.47521	2.80562	6.55867	2.69125	0.070173	0.792916	920.269	16.9802	914.793	22.9524	933.399	16.2531	933.399	16.2531	0.980067
-15KM50 Spot 103	28.6353	0.875233	1.41785	4.1103	6.89997	3.90781	0.0709537	1.2742	896.459	24.4787	872.47	31.8882	956.062	26.0585	956.062	26.0585	0.912566
-15KM50 Spot 37	48.2307	2.21453	1.6927	3.45389	5.87136	3.24318	0.0720806	1.18792	1005.78	22.0495	1013.87	30.4264	988.226	24.1503	988.226	24.1503	1.02594
-15KM50 Spot 31	211.557	3.97748	1.75861	3.75071	5.70866	3.55758	0.0728118	1.18806	1030.33	24.2832	1040.55	34.1854	1008.7	24.0865	1008.7	24.0865	1.03157
-15KM50 Spot 48	83.8368	1.95547	1.74553	3.59343	5.76246	3.36669	0.0729516	1.25624	1025.51	23.2015	1031.57	32.0938	1012.59	25.457	1012.59	25.457	1.01874
-15KM50 Spot 13	90.1189	1.06188	1.67041	3.59058	6.02452	3.33777	0.0729867	1.32348	997.341	22.8093	989.969	30.631	1013.56	26.8154	1013.56	26.8154	0.976721
-15KM50 Spot 18	373.209	3.81794	1.7996	3.19232	5.62872	3.08212	0.0734656	0.831519	1045.31	20.839	1054.18	29.9738	1026.8	16.8185	1026.8	16.8185	1.02666
-15KM50 Spot 87	361.881	7.56354	1.67453	3.36622	6.09058	3.21448	0.0739691	0.99926	998.907	21.4034	980.009	29.2247	1040.61	20.1875	1040.61	20.1875	0.941767
-15KM50 Spot 80	265.995	5.363	1.77494	3.11671	5.75853	2.93225	0.0741301	1.05632	1036.33	20.2449	1032.22	27.9686	1045.03	21.3258	1045.03	21.3258	0.987743
-15KM50 Spot 89	427.798	2.6258	1.81119	2.60146	5.6985	2.46372	0.0748553	0.835257	1049.51	17.0201	1042.26	23.7102	1064.64	16.7978	1064.64	16.7978	0.978982
-15KM50 Spot 58	248.053	3.05293	1.91119	3.15664	5.44442	2.86405	0.0754664	1.32725	1085	21.045	1087.02	28.6495	1080.94	26.6282	1080.94	26.6282	1.00562
-15KM50 Spot 64	771.964	15.614	1.69609	3.02126	6.14434	2.88164	0.0755827	0.90783	1007.06	19.3012	972.049	26.0015	1084.02	18.2047	1084.02	18.2047	0.896707
-15KM50 Spot 65	111.72	2.24029	1.85138	3.1757	5.64647	3.03317	0.0758177	0.940743	1063.92	20.9398	1051.12	29.4189	1090.24	18.8277	1090.24	18.8277	0.964119
-15KM50 Spot 6	470.288	3.32069	1.94502	2.19542	5.37892	1.97102	0.0758782	0.966917	1096.73	14.7236	1099.19	19.9189	1091.84	19.3484	1091.84	19.3484	1.00673
-15KM50 Spot 72	164.554	3.53838	1.78157	4.32833	6.00244	3.82126	0.0775583	2.03284	1038.75	28.1562	993.345	35.1787	1135.56	40.4582	1135.56	40.4582	0.874759
-15KM50 Spot 4	42.4965	1.80427	2.23611	6.3514	4.85869	6.19009	0.0787975	1.42232	1192.44	44.5911	1206.49	68.1131	1167.03	28.1737	1167.03	28.1737	1.03381
-15KM50 Spot 41	572.586	2.29121	1.99096	2.66032	5.48789	2.44401	0.0792439	1.05079	1112.45	17.983	1079.09	24.2839	1178.25	20.794	1178.25	20.794	0.915837
-15KM50 Spot 73	243.261	4.46375	1.98284	3.27201	5.52323	3.08124	0.079429	1.10092	1109.69	22.0888	1072.73	30.4498	1182.86	21.7576	1182.86	21.7576	0.90689
-15KM50 Spot 104	420.813	5.22208	2.33418	2.6927	4.77065	2.47144	0.0807628	1.06895	1222.75	19.1432	1226.77	27.6087	1215.7	21.0361	1215.7	21.0361	1.00911
-15KM50 Spot 63	412.943	6.13515	2.32769	2.92734	4.86094	2.78081	0.0820622	0.914557	1220.77	20.7944	1205.98	30.5862	1246.98	17.9141	1246.98	17.9141	0.967121
-15KM50 Spot 106	235.329	4.25023	2.48081	2.76857	4.63401	2.68132	0.0833778	0.689556	1266.45	20.038	1259.62	30.6798	1278.06	13.4274	1278.06	13.4274	0.985576
-15KM50 Spot 10	118.011	2.37874	2.64846	3.07685	4.41695	2.91968	0.0848427	0.970807	1314.21	22.6826	1315.61	34.7458	1311.93	18.8353	1311.93	18.8353	1.0028
-15KM50 Spot 75	251.683	7.54816	2.52771	2.24552	4.79733	2.04794	0.0879477	0.92103	1280.04	16.3387	1220.55	22.7725	1381.32	17.6978	1381.32	17.6978	0.88361
-15KM50 Spot 71	89.9597	1.62867	2.95178	3.85084	4.1418	3.70256	0.088669	1.05831	1395.3	29.2144	1394.18	46.4208	1397	20.2906	1397	20.2906	0.997982
-15KM50 Spot 5	70.4061	2.53219	2.95007	2.50993	4.16491	2.27572	0.0891122	1.05871	1394.87	19.0358	1387.22	28.4038	1406.55	20.272	1406.55	20.272	0.986256
-15KM50 Spot 34	114.194	1.90523	3.02851	3.49157	4.06048	3.35327	0.0891876	0.97297	1414.83	26.6585	1419.24	42.7171	1408.17	18.6261	1408.17	18.6261	1.00786
-15KM50 Spot 16	281.796	2.5064	3.00816	3.6499	4.09434	3.42631	0.0893274	1.25784	1409.69	27.8212	1408.7	43.3574	1411.17	24.07	1411.17	24.07	0.998248
-15KM50 Spot 21	177.245	0.932562	3.0673	2.88428	4.02323	2.67265	0.0895014	1.08443	1424.56	22.0895	1431.03	34.299	1414.89	20.7409	1414.89	20.7409	1.0114
-15KM50 Spot 62	112.857	1.55406	3.14013	3.6896	3.94054	3.5427	0.0897433	1.03074	1442.58	28.4221	1457.9	46.226	1420.05	19.7002	1420.05	19.7002	1.02665
-15KM50 Spot 57	157.272	1.59451	3.15464	3.95543	3.92848	3.77202	0.089882	1.19052	1446.13	30.505	1461.9	49.3386	1423.01	22.7452	1423.01	22.7452	1.02734
-15KM50 Spot 44	116.772	1.88859	3.07795	2.80363	4.04196	2.64755	0.0902303	0.922386	1427.22	21.4899	1425.08	33.8506	1430.39	17.6045	1430.39	17.6045	0.996285
-15KM50 Spot 108	262.851	2.82962	3.1093	2.29724	4.01153	2.16747	0.0904629	0.761165	1434.99	17.6512	1434.77	27.8807	1435.3	14.5177	1435.3	14.5177	0.999628
-15KM50 Spot 36	359.479	2.15823	3.06084	2.58225	4.0887	2.35397	0.0907662	1.06155	1422.95	19.7655	1410.45	29.8205	1441.68	20.2297	1441.68	20.2297	0.978332
-15KM50 Spot 2	414.33	2.93953	3.07368	3.35534	4.08701	3.17408	0.0911094	1.0879	1426.15	25.7117	1410.97	40.2234	1448.87	20.7119	1448.87	20.7119	0.973838
-15KM50 Spot 70	239.134	2.30146	3.03695	3.02387	4.1546	2.85338	0.0915094	1.00101	1416.96	23.1022	1390.32	35.6852	1457.21	19.0361	1457.21	19.0361	0.954101
-15KM50 Spot 47	169.572	3.64114	3.45673	3.40332	3.83526	3.22509	0.096152	1.08692	1517.4	26.8091	1493.62	42.9979	1550.73	20.4142	1550.73	20.4142	0.963174
-15KM50 Spot 19	432.648	3.26759	3.83923	2.84996	3.63449	2.6806	0.101201	0.967815	1601.01	22.962	1566.85	37.2866	1646.25	17.9513	1646.25	17.9513	0.951769
-15KM50 Spot 77	152.077	4.57818	4.23924	3.53839	3.33075	3.4408	0.102407	0.825292	1681.65	29.0786	1692.46	51.2182	1668.18	15.2645	1668.18	15.2645	1.01456
-15KM50 Spot 55	131.181	2.85667	4.0673	2.61122	3.4866	2.48723	0.102851	0.795077	1647.77	21.2847	1625.58	35.7374	1676.17	14.6906	1676.17	14.6906	0.969817
-15KM50 Spot 7	575.398	2.24648	4.34629	3.19653	3.41282	3.06457	0.10758	0.908949	1702.19	26.392	1656.57	44.7692	1758.81	16.6231	1758.81	16.6231	0.941869
-15KM50 Spot 27	602.277	2.3787	4.52759	3.33886	3.3129	3.20119	0.108786	0.948865	1736.05	27.7759	1700.48	47.8485	1779.18	17.3076	1779.18	17.3076	0.955765
-15KM50 Spot 101	333.621	2.98213	5.91503	2.75561	2.94656	2.62288	0.126407	0.844919	1963.44	23.9382	1883.68	42.8435	2048.58	14.9253	2048.58	14.9253	0.919507
-15KM50 Spot 1	77.3134	2.4491	6.59701	3.67109	2.64999	3.55292	0.126792	0.923913	2058.95	32.38	2063.94	62.7517	2053.94	16.313	2053.94	16.313	1.00487
-15KM50 Spot 92	106.661	1.61542	6.14671	4.91167	2.9566	4.77659	0.131806	1.14397	1996.9	42.9195	1878.13	77.8279	2122.15	20.0415	2122.15	20.0415	0.885015
-15KM50 Spot 20	230.247	0.872378	13.4858	2.95275	1.95225	2.84939	0.190946	0.774416	2714.29	27.919	2666.14	62.22	2750.31	12.729	2750.31	12.729	0.969395
-15KM50 Spot 29	162.742	5.4024	0.565272	7.67769	33.8233	3.34752	7.21155	6.90949	454.952	28.1604	187.828	6.19687	2210.61	120.022	187.828	6.19687	0.0849668
-15KM50 Spot 84	84.1448	2.71336	0.5832	17.5914	33.2893	5.60769	7.10198	16.6737	466.516	65.8903	190.797	10.5425	2237.13	290.616	190.797	10.5425	0.0852865
-15KM50 Spot 102	365.83	3.09337	0.466587	6.94555	24.8546	5.09976	11.8895	4.7152	388.828	22.4405	254.283	12.7154	1295.03	91.7479	254.283	12.7154	0.196353
* Radiogenic
† Analyses with greater than 10% uncertainty in 207/206 age (1-sigma) or 5% uncertainty in 206/238 age (1-sigma) are excluded. Ages >600 Ma with >20% discordance and/or 5% reverse discordance are excluded. Accepted ages calculated using 206Pb/238U ages for grains younger than 900 Ma and 207Pb/206Pb ages for grains older than 900 Ma.
§ Calculated based on 206Pb/238U age vs. 207Pb/206Pb age.
Decay constants used in age calculations: λ238U = 1.55125 x 10^-10, λ235U= 9.8485x10^-10 (Jaffey et al., 1971); 238U/235U = 137.88 (Chen and Wasserberg, 1981). Common Pb correction from measured 206Pb/204Pb, with initial Pb composition from Stacey and Kramers (1975).
Sample: Galice Formation 14CM43; analyzed at ALC			Isotope Ratios						Apparent Ages
Analysis	U	U/Th	207Pb*	± 1-sigma	238U	± 1-sigma	207Pb*	± 1-sigma	207Pb*	± 1-sigma	206Pb*	± 1-sigma	207Pb*	± 1-sigma	Best age†	± 1-sigma	Conc.§
	(ppm)		235U	(%)	206Pb*	(%)	206Pb*	(%)	235U	(Ma)	238U	(Ma)	206Pb*	(Ma)	(Ma)	(Ma)	(%)
Complete 14cm43Chapman3212015THIRDRUN-Spot 45	128.376	4.29483	0.161502	7.50948	41.9782	3.25717	0.04917	6.76632	152.017	10.6026	151.765	4.88552	155.946	158.544	151.765	4.88552	0.97319
Complete 14cm43Chapman3212015THIRDRUN-Spot 108	216.562	2.94698	0.162788	5.56917	41.7985	2.70936	0.0493495	4.8657	153.141	7.91685	152.41	4.08091	164.448	113.808	152.41	4.08091	0.926796
Complete 14cm43Chapman3212015THIRDRUN-Spot 165	258.631	2.625	0.167599	4.69544	41.7234	2.67177	0.0507166	3.86119	157.333	6.84369	152.681	4.03136	227.966	89.2334	152.681	4.03136	0.669754
Complete 14cm43Chapman3212015THIRDRUN-Spot 64	90.3252	2.08709	0.165068	9.02381	41.4094	3.61794	0.0495746	8.26678	155.129	12.9824	153.825	5.49943	175.073	193.114	153.825	5.49943	0.878634
Complete 14cm43Chapman3212015THIRDRUN-Spot 58	402.505	2.78027	0.161539	3.68265	41.2026	2.3518	0.0482725	2.83389	152.049	5.2004	154.588	3.59236	112.63	66.8694	154.588	3.59236	1.37253
Complete 14cm43Chapman3212015THIRDRUN-Spot 83	434.362	2.26977	0.167206	4.3433	41.1225	2.95994	0.0498688	3.17852	156.991	6.3177	154.886	4.52989	188.86	73.9691	154.886	4.52989	0.820107
Complete 14cm43Chapman3212015THIRDRUN-Spot 41	501.312	1.87908	0.164617	5.68904	41.1106	4.62611	0.0490825	3.31124	154.736	8.16524	154.93	7.08178	151.788	77.5976	154.93	7.08178	1.0207
Complete 14cm43Chapman3212015THIRDRUN-Spot 89	182.616	3.65082	0.166539	4.71208	40.9508	3.17399	0.0494625	3.48274	156.411	6.83069	155.527	4.87735	169.789	81.3474	155.527	4.87735	0.916001
Complete 14cm43Chapman3212015THIRDRUN-Spot 70	304.319	2.91208	0.16425	5.53081	40.9248	4.09777	0.0487517	3.71459	154.416	7.92294	155.625	6.30078	135.918	87.2995	155.625	6.30078	1.14499
Complete 14cm43Chapman3212015THIRDRUN-Spot 105	287.058	3.68414	0.169419	5.08635	40.8906	2.90888	0.050244	4.17245	158.915	7.48231	155.753	4.47639	206.322	96.8198	155.753	4.47639	0.754905
Complete 14cm43Chapman3212015THIRDRUN-Spot 67	351.029	3.16686	0.165801	4.5317	40.7738	3.3591	0.0490306	3.04183	155.768	6.54425	156.194	5.18367	149.286	71.3138	156.194	5.18367	1.04628
Complete 14cm43Chapman3212015THIRDRUN-Spot 65	194.092	3.90911	0.170708	6.23032	40.6665	4.65375	0.0503488	4.14241	160.033	9.2248	156.601	7.20002	211.143	96.0311	156.601	7.20002	0.741683
Complete 14cm43Chapman3212015THIRDRUN-Spot 16	189.513	2.34846	0.166556	6.12128	40.5699	3.70879	0.0490075	4.86981	156.426	8.87438	156.97	5.75137	148.187	114.251	156.97	5.75137	1.05927
Complete 14cm43Chapman3212015THIRDRUN-Spot 10	835.379	2.13149	0.168447	3.95524	40.545	3.56157	0.0495335	1.72021	158.07	5.78977	157.065	5.52639	173.138	40.1522	157.065	5.52639	0.90717
Complete 14cm43Chapman3212015THIRDRUN-Spot 98	597.081	3.32312	0.169418	4.44981	40.1989	3.21223	0.0493937	3.07935	158.914	6.54587	158.401	5.02619	166.54	71.9643	158.401	5.02619	0.951128
Complete 14cm43Chapman3212015THIRDRUN-Spot 84	416.545	3.6515	0.167231	5.07172	40.1955	2.97514	0.048752	4.10742	157.013	7.37823	158.414	4.65561	135.924	96.5491	158.414	4.65561	1.16546
Complete 14cm43Chapman3212015THIRDRUN-Spot 99	392.261	3.74026	0.1689	4.76002	40.1682	3.63128	0.0492052	3.07759	158.464	6.98391	158.521	5.68613	157.625	72.0191	158.521	5.68613	1.00568
Complete 14cm43Chapman3212015THIRDRUN-Spot 79	371	3.65749	0.169329	4.58787	40.1011	3.05955	0.0492479	3.41873	158.837	6.74595	158.782	4.79868	159.669	80.0108	158.782	4.79868	0.994446
Complete 14cm43Chapman3212015THIRDRUN-Spot 78	241.003	4.12833	0.169558	4.54834	40.1007	1.95974	0.0493138	4.10449	159.035	6.69554	158.784	3.07375	162.755	95.9809	158.784	3.07375	0.975602
Complete 14cm43Chapman3212015THIRDRUN-Spot 5	127.305	5.56215	0.154367	4.90208	40.0938	1.87808	0.0448881	4.52805	145.761	6.65622	158.811	2.94616	61.702	110.464	158.811	2.94616	2.57384
Complete 14cm43Chapman3212015THIRDRUN-Spot 19	253.569	2.1253	0.1775	4.43047	39.9865	2.38052	0.0514767	3.73661	165.907	6.78148	159.232	3.74411	262.211	85.8466	159.232	3.74411	0.607268
Complete 14cm43Chapman3212015THIRDRUN-Spot 13	197.294	4.4222	0.168716	4.86135	39.8887	3.44928	0.0488095	3.42567	158.304	7.12592	159.617	5.43805	138.688	80.4719	159.617	5.43805	1.15091
Complete 14cm43Chapman3212015THIRDRUN-Spot 96	327.419	3.88387	0.169721	4.37419	39.7882	2.82401	0.0489767	3.34043	159.177	6.44447	160.016	4.46324	146.738	78.3729	160.016	4.46324	1.09049
Complete 14cm43Chapman3212015THIRDRUN-Spot 21	720.861	18.1019	0.173661	3.20834	39.7142	2.36133	0.0500204	2.17199	162.591	4.82029	160.31	3.73877	195.965	50.4811	160.31	3.73877	0.818056
Complete 14cm43Chapman3212015THIRDRUN-Spot 18	1245.83	2.66755	0.172601	3.54424	39.6466	2.59389	0.0496303	2.41524	161.674	5.29724	160.58	4.11383	177.695	56.3376	160.58	4.11383	0.903688
Complete 14cm43Chapman3212015THIRDRUN-Spot 6	548.796	2.90367	0.173638	3.94204	39.5776	2.94795	0.0498416	2.61711	162.571	5.92196	160.857	4.6833	187.589	60.9144	160.857	4.6833	0.857495
Complete 14cm43Chapman3212015THIRDRUN-Spot 52	837.04	4.82113	0.172352	3.87436	39.5374	2.66528	0.0494222	2.81193	161.458	5.78352	161.018	4.23844	167.886	65.7095	161.018	4.23844	0.959094
Complete 14cm43Chapman3212015THIRDRUN-Spot 107	532.998	2.44503	0.174764	4.46486	39.3368	3.85407	0.0498595	2.25415	163.545	6.74442	161.829	6.15937	188.428	52.4751	161.829	6.15937	0.858839
Complete 14cm43Chapman3212015THIRDRUN-Spot 23	433.622	1.57408	0.16881	3.62531	39.1681	2.02272	0.0479544	3.00856	158.385	5.31658	162.517	3.24618	96.9996	71.2098	162.517	3.24618	1.67544
Complete 14cm43Chapman3212015THIRDRUN-Spot 54	1171.28	4.07701	0.187915	5.71992	39.1277	2.6859	0.0533266	5.05009	174.848	9.1877	162.683	4.31483	342.74	114.381	162.683	4.31483	0.474653
Complete 14cm43Chapman3212015THIRDRUN-Spot 24	616.814	4.40402	0.181402	2.91904	38.5183	1.89682	0.0506765	2.21876	169.266	4.55111	165.224	3.09419	226.154	51.3087	165.224	3.09419	0.730583
Complete 14cm43Chapman3212015THIRDRUN-Spot 53	447.579	5.93318	0.17684	4.21359	38.2988	2.81565	0.0491206	3.13472	165.338	6.42911	166.159	4.61868	153.602	73.4378	166.159	4.61868	1.08175
Complete 14cm43Chapman3212015THIRDRUN-Spot 9	715.434	5.16027	0.185887	3.2834	37.6959	2.02814	0.0508209	2.58212	173.114	5.22593	168.782	3.37871	232.695	59.6257	168.782	3.37871	0.725337
Complete 14cm43Chapman3212015THIRDRUN-Spot 46	921.133	3.09146	0.186433	4.89714	37.653	4.07295	0.0509121	2.71901	173.581	7.81377	168.972	6.79273	236.845	62.7522	168.972	6.79273	0.713427
Complete 14cm43Chapman3212015THIRDRUN-Spot 43	402.271	4.00956	0.18647	5.6064	37.6527	4.38407	0.0509219	3.49452	173.613	8.947	168.973	7.31165	237.282	80.6148	168.973	7.31165	0.712119
Complete 14cm43Chapman3212015THIRDRUN-Spot 74	473.039	5.46032	0.177594	5.86906	37.6452	5.17322	0.0484881	2.77195	165.988	8.98755	169.006	8.62945	123.131	65.2768	169.006	8.62945	1.37257
Complete 14cm43Chapman3212015THIRDRUN-Spot 81	222.544	5.2901	0.175114	4.79662	37.6084	2.50449	0.0477644	4.09085	163.847	7.25794	169.17	4.18173	87.6364	97.0044	169.17	4.18173	1.93036
Complete 14cm43Chapman3212015THIRDRUN-Spot 103	229.211	2.27713	0.173444	4.86455	37.4715	3.51132	0.0471369	3.36667	162.404	7.30092	169.779	5.88368	56.1781	80.3136	169.779	5.88368	3.02216
Complete 14cm43Chapman3212015THIRDRUN-Spot 33	344.428	2.43624	0.174564	5.47185	37.149	4.0445	0.0470329	3.68554	163.372	8.25758	171.234	6.83438	50.9181	88.0064	171.234	6.83438	3.36293
Complete 14cm43Chapman3212015THIRDRUN-Spot 29	1658.38	22.5099	0.184144	3.50521	36.8259	2.68438	0.0491823	2.25402	171.62	5.53479	172.717	4.57481	156.541	52.7586	172.717	4.57481	1.10333
Complete 14cm43Chapman3212015THIRDRUN-Spot 102	77.1605	4.74867	0.217835	9.06302	32.9155	3.15555	0.0520028	8.49593	200.106	16.4619	192.931	5.99784	285.555	194.592	192.931	5.99784	0.675636
Complete 14cm43Chapman3212015THIRDRUN-Spot 7	57.1631	4.11782	0.200897	9.0411	31.8395	3.02309	0.0463914	8.5207	185.885	15.3586	199.352	5.93436	17.988	204.981	199.352	5.93436	11.0825
Complete 14cm43Chapman3212015THIRDRUN-Spot 15	1535.97	6.31215	0.300355	2.17158	23.686	1.32209	0.051597	1.72275	266.678	5.09311	266.573	3.45246	267.57	39.5429	266.573	3.45246	0.996277
Complete 14cm43Chapman3212015THIRDRUN-Spot 92	200.055	3.21826	0.936982	3.50285	9.08575	2.72915	0.0617434	2.19584	671.301	17.2068	673.11	17.4437	665.255	47.0391	673.11	17.4437	1.01181
Complete 14cm43Chapman3212015THIRDRUN-Spot 38	211.092	2.74201	0.936862	7.38287	9.00903	6.7758	0.0612143	2.93177	671.239	36.2758	678.551	43.6409	646.793	63.0146	678.551	43.6409	1.0491
Complete 14cm43Chapman3212015THIRDRUN-Spot 60	148.91	2.38467	1.39409	4.92859	7.28544	4.43745	0.0736625	2.14476	886.434	29.1489	829.15	34.5255	1032.22	43.3676	1032.22	43.3676	0.803271
Complete 14cm43Chapman3212015THIRDRUN-Spot 8	364.29	4.50185	2.15032	2.83111	4.96672	2.27084	0.0774589	1.69069	1165.16	19.6241	1182.52	24.5342	1133.04	33.6599	1133.04	33.6599	1.04367
Complete 14cm43Chapman3212015THIRDRUN-Spot 110	166.14	3.7955	2.63018	4.49572	4.42098	3.70932	0.084334	2.54017	1309.11	33.0857	1314.52	44.1104	1300.25	49.3628	1300.25	49.3628	1.01097
Complete 14cm43Chapman3212015THIRDRUN-Spot 48	528.52	3.20078	2.5056	2.93762	4.67093	2.34608	0.0848816	1.76792	1273.66	21.3225	1250.57	26.6692	1312.82	34.2987	1312.82	34.2987	0.952586
Complete 14cm43Chapman3212015THIRDRUN-Spot 27	128.165	4.06036	2.46487	6.18762	4.87614	2.89657	0.0871706	5.46777	1261.79	44.7241	1202.55	31.777	1364.25	105.386	1364.25	105.386	0.881475
Complete 14cm43Chapman3212015THIRDRUN-Spot 73	204.076	3.71164	3.05586	4.32598	3.98644	3.49781	0.0883524	2.54547	1421.7	33.1069	1442.86	45.22	1390.14	48.8582	1390.14	48.8582	1.03792
Complete 14cm43Chapman3212015THIRDRUN-Spot 80	625.827	0.807573	2.45586	3.12448	5.01792	2.64976	0.0893771	1.65564	1259.15	22.549	1171.48	28.3845	1412.24	31.6786	1412.24	31.6786	0.829523
Complete 14cm43Chapman3212015THIRDRUN-Spot 62	262.522	2.78923	3.07814	3.03508	4.02796	2.48423	0.0899234	1.74365	1427.26	23.2649	1429.52	31.8509	1423.88	33.3101	1423.88	33.3101	1.00396
Complete 14cm43Chapman3212015THIRDRUN-Spot 90	428.001	3.57864	2.91248	3.60144	4.26753	3.3057	0.0901446	1.42923	1385.16	27.2284	1357.14	40.4557	1428.58	27.2857	1428.58	27.2857	0.949994
Complete 14cm43Chapman3212015THIRDRUN-Spot 51	264.706	4.77632	2.81769	4.09096	4.43164	3.65119	0.0905643	1.8452	1360.25	30.6676	1311.66	43.3339	1437.44	35.1858	1437.44	35.1858	0.912498
Complete 14cm43Chapman3212015THIRDRUN-Spot 37	210.487	3.11313	3.21189	3.03771	3.9291	2.20994	0.0915277	2.08419	1460.03	23.5254	1461.7	28.9025	1457.59	39.6361	1457.59	39.6361	1.00282
Complete 14cm43Chapman3212015THIRDRUN-Spot 93	152.136	5.2882	3.16997	4.16129	4.05768	3.72313	0.0932894	1.85866	1449.88	32.131	1420.12	47.4551	1493.75	35.1738	1493.75	35.1738	0.950708
Complete 14cm43Chapman3212015THIRDRUN-Spot 35	481.062	4.43094	2.79387	2.26051	4.73037	1.67471	0.0958515	1.51831	1353.9	16.9044	1236.27	18.8398	1544.85	28.5378	1544.85	28.5378	0.800256
Complete 14cm43Chapman3212015THIRDRUN-Spot 68	345.797	3.02495	4.03761	3.15733	3.49202	2.43209	0.102259	2.01338	1641.81	25.7006	1623.35	34.9028	1665.5	37.2576	1665.5	37.2576	0.97469
Complete 14cm43Chapman3212015THIRDRUN-Spot 57	467.656	8.86645	4.24	2.64424	3.36036	2.47044	0.103336	0.942831	1681.8	21.7286	1679.33	36.5237	1684.86	17.4036	1684.86	17.4036	0.996718
Complete 14cm43Chapman3212015THIRDRUN-Spot 72	513.207	0.936274	3.87533	4.49179	3.74175	4.12943	0.105168	1.76748	1608.56	36.2693	1526.85	56.1411	1717.23	32.491	1717.23	32.491	0.889138
Complete 14cm43Chapman3212015THIRDRUN-Spot 14	507.831	4.84079	4.37171	4.68999	3.32023	4.49851	0.105274	1.32645	1707.01	38.775	1697.18	67.1267	1719.08	24.3763	1719.08	24.3763	0.987258
Complete 14cm43Chapman3212015THIRDRUN-Spot 2	275.448	4.9783	4.65692	4.73268	3.15851	4.33505	0.106679	1.89885	1759.54	39.58	1773.13	67.2032	1743.42	34.794	1743.42	34.794	1.01704
Complete 14cm43Chapman3212015THIRDRUN-Spot 42	408.918	4.51732	4.67788	3.36804	3.16008	2.83852	0.107213	1.81286	1763.29	28.1826	1772.36	43.9861	1752.55	33.1783	1752.55	33.1783	1.0113
Complete 14cm43Chapman3212015THIRDRUN-Spot 39	465.108	5.75242	4.6547	4.12428	3.20358	3.78799	0.10815	1.6312	1759.14	34.4848	1751.28	58.0924	1768.47	29.7938	1768.47	29.7938	0.990282
Complete 14cm43Chapman3212015THIRDRUN-Spot 77	770.465	20.6633	4.68094	5.39734	3.19348	5.14082	0.108417	1.64418	1763.84	45.1866	1756.13	79.0309	1772.97	30.016	1772.97	30.016	0.990502
Complete 14cm43Chapman3212015THIRDRUN-Spot 28	473.6	5.41385	4.74678	3.32784	3.15243	2.49296	0.108528	2.20447	1775.54	27.9175	1776.12	38.7023	1774.85	40.2363	1774.85	40.2363	1.00072
Complete 14cm43Chapman3212015THIRDRUN-Spot 100	317.385	1.77094	4.80662	2.96069	3.11579	2.40406	0.108619	1.72807	1786.06	24.8901	1794.35	37.6543	1776.37	31.5346	1776.37	31.5346	1.01012
Complete 14cm43Chapman3212015THIRDRUN-Spot 36	284.834	10.5287	4.87663	3.2713	3.11548	2.89403	0.11019	1.52511	1798.23	27.5707	1794.5	45.3324	1802.53	27.7388	1802.53	27.7388	0.995548
Complete 14cm43Chapman3212015THIRDRUN-Spot 75	219.132	3.48426	4.96672	2.91407	3.07548	2.30266	0.110785	1.78594	1813.67	24.6348	1814.85	36.4228	1812.31	32.4471	1812.31	32.4471	1.0014
Complete 14cm43Chapman3212015THIRDRUN-Spot 30	104.22	2.735	4.91924	4.22703	3.15814	3.65904	0.112675	2.11641	1805.56	35.6842	1773.31	56.7279	1842.99	38.3073	1842.99	38.3073	0.96219
Complete 14cm43Chapman3212015THIRDRUN-Spot 40	246.605	3.09471	4.81653	6.09987	3.24187	5.89395	0.113248	1.57155	1787.79	51.3323	1733.14	89.5767	1852.16	28.413	1852.16	28.413	0.935743
Complete 14cm43Chapman3212015THIRDRUN-Spot 26	203.257	4.56634	5.31607	2.957	2.94186	2.58238	0.113426	1.44053	1871.45	25.2764	1886.29	42.2322	1854.99	26.035	1854.99	26.035	1.01687
Complete 14cm43Chapman3212015THIRDRUN-Spot 4	248.541	15.2993	5.15958	4.32627	3.03446	3.99932	0.113552	1.64986	1845.98	36.8126	1836.19	63.9047	1857	29.8117	1857	29.8117	0.988791
Complete 14cm43Chapman3212015THIRDRUN-Spot 11	121.288	1.11686	5.56059	3.34643	2.83375	2.47406	0.114283	2.25336	1910.02	28.8075	1948.38	41.6016	1868.59	40.6609	1868.59	40.6609	1.0427
Complete 14cm43Chapman3212015THIRDRUN-Spot 17	493.745	1.3126	4.47331	2.77956	3.5658	2.29736	0.115687	1.56463	1726.03	23.0706	1593.59	32.4365	1890.59	28.1574	1890.59	28.1574	0.842903
Complete 14cm43Chapman3212015THIRDRUN-Spot 95	349.39	6.81737	5.22591	3.26024	3.07316	2.84088	0.116479	1.59955	1856.85	27.7937	1816.04	44.9621	1902.86	28.7418	1902.86	28.7418	0.954373
Complete 14cm43Chapman3212015THIRDRUN-Spot 1	545.184	5.48706	5.54663	2.45031	2.92856	2.19003	0.11781	1.09899	1907.85	21.0826	1893.71	35.9367	1923.26	19.6996	1923.26	19.6996	0.984637
Complete 14cm43Chapman3212015THIRDRUN-Spot 59	95.8458	1.32871	5.47365	3.07408	2.99896	2.80062	0.119054	1.26746	1896.47	26.3979	1855.08	45.1475	1942.06	22.6674	1942.06	22.6674	0.955209
Complete 14cm43Chapman3212015THIRDRUN-Spot 55	278.928	1.57296	5.03017	4.45313	3.271	4.12171	0.119333	1.6858	1824.41	37.7354	1719.6	62.2128	1946.25	30.1367	1946.25	30.1367	0.883545
Complete 14cm43Chapman3212015THIRDRUN-Spot 47	496.666	3.66794	5.68205	3.02117	3.1597	2.59197	0.130212	1.55215	1928.64	26.0913	1772.54	40.1691	2100.81	27.2571	2100.81	27.2571	0.843745
Complete 14cm43Chapman3212015THIRDRUN-Spot 25	329.165	2.44537	6.5375	3.37281	2.91575	3.02768	0.138249	1.48626	2050.96	29.7119	1900.92	49.8451	2205.37	25.7989	2205.37	25.7989	0.861951
Complete 14cm43Chapman3212015THIRDRUN-Spot 50	108.692	3.13028	8.94345	2.82796	2.297	2.03499	0.148993	1.96371	2332.25	25.8324	2329.79	39.7894	2334.39	33.6222	2334.39	33.6222	0.998031
Complete 14cm43Chapman3212015THIRDRUN-Spot 87	129.175	1.09793	9.01224	2.88261	2.28051	2.40785	0.149061	1.58484	2339.25	26.3521	2343.91	47.3167	2335.17	27.1336	2335.17	27.1336	1.00374
Complete 14cm43Chapman3212015THIRDRUN-Spot 63	426.438	2.99131	9.00577	4.29104	2.42385	3.94854	0.158316	1.67989	2338.59	39.2354	2226.65	74.3464	2437.74	28.4583	2437.74	28.4583	0.913407
Complete 14cm43Chapman3212015THIRDRUN-Spot 22	166.646	2.13175	10.5049	2.73491	2.15773	2.11168	0.164394	1.73798	2480.35	25.3614	2454.78	43.11	2501.35	29.2549	2501.35	29.2549	0.981379
Complete 14cm43Chapman3212015THIRDRUN-Spot 32	220.106	3.65437	11.7535	3.32165	1.98462	2.66032	0.169177	1.98899	2584.97	31.0927	2630.43	57.4613	2549.51	33.3223	2549.51	33.3223	1.03174
Complete 14cm43Chapman3212015THIRDRUN-Spot 34	474.216	2.77472	10.7408	3.95439	2.2202	3.58218	0.172952	1.67487	2500.96	36.7483	2397.08	71.7135	2586.4	27.9576	2586.4	27.9576	0.926799
Complete 14cm43Chapman3212015THIRDRUN-Spot 31	276.214	3.55909	11.7221	5.70075	2.0528	5.46167	0.174522	1.63362	2582.47	53.3837	2558.29	115.343	2601.47	27.2291	2601.47	27.2291	0.983401
Complete 14cm43Chapman3212015THIRDRUN-Spot 86	94.1794	2.59508	12.5232	3.93076	1.98604	3.67361	0.180385	1.39838	2644.47	36.9772	2628.89	79.3118	2656.4	23.1849	2656.4	23.1849	0.989641
Complete 14cm43Chapman3212015THIRDRUN-Spot 66	129.96	1.85971	12.7761	2.49033	1.96247	2.0411	0.181845	1.42677	2663.29	23.4551	2654.76	44.4156	2669.76	23.6258	2669.76	23.6258	0.994383
Complete 14cm43Chapman3212015THIRDRUN-Spot 101	255.922	3.26719	12.9472	3.73448	1.96594	3.33946	0.184606	1.67163	2675.82	35.2146	2650.91	72.5855	2694.68	27.6166	2694.68	27.6166	0.983759
Complete 14cm43Chapman3212015THIRDRUN-Spot 104	470.333	1.97447	11.8057	3.96097	2.17793	3.54092	0.18648	1.77516	2589.11	37.0948	2435.81	71.8304	2711.35	29.2786	2711.35	29.2786	0.898377
Complete 14cm43Chapman3212015THIRDRUN-Spot 94	157.664	1.32844	14.2641	2.44561	1.869	2.1852	0.193354	1.09815	2767.43	23.2095	2762.67	49.1006	2770.89	18.0125	2770.89	18.0125	0.997033
Complete 14cm43Chapman3212015THIRDRUN-Spot 76	136.986	2.71377	15.0667	3.58524	1.93594	3.04664	0.211548	1.88997	2819.47	34.151	2684.51	66.8971	2917.43	30.6016	2917.43	30.6016	0.920162
Complete 14cm43Chapman3212015THIRDRUN-Spot 71	593.64	2.29682	19.0737	2.88195	1.74169	2.43939	0.240937	1.53459	3045.55	27.812	2924.86	57.3579	3126.16	24.4161	3126.16	24.4161	0.935611
* Radiogenic
† Analyses with greater than 10% uncertainty in 207/206 age (1-sigma) or 5% uncertainty in 206/238 age (1-sigma) are excluded. Ages >600 Ma with >20% discordance and/or 5% reverse discordance are excluded. Accepted ages calculated using 206Pb/238U ages for grains younger than 900 Ma and 207Pb/206Pb ages for grains older than 900 Ma.
§ Calculated based on 206Pb/238U age vs. 207Pb/206Pb age.
Decay constants used in age calculations: λ238U = 1.55125 x 10^-10, λ235U= 9.8485x10^-10 (Jaffey et al., 1971); 238U/235U = 137.88 (Chen and Wasserberg, 1981). Common Pb correction from measured 206Pb/204Pb, with initial Pb composition from Stacey and Kramers (1975).
Sample: Galice Formation 19KM1; analyzed at ALC			Isotope Ratios						Apparent Ages
Analysis	U	U/Th	207Pb*	± 1-sigma	238U	± 1-sigma	207Pb*	± 1-sigma	207Pb*	± 1-sigma	206Pb*	± 1-sigma	207Pb*	± 1-sigma	Best age†	± 1-sigma	Conc.§
	(ppm)		235U	(%)	206Pb*	(%)	206Pb*	(%)	235U	(Ma)	238U	(Ma)	206Pb*	(Ma)	(Ma)	(Ma)	(%)
19KM1 34	264.719	2.00875	0.265433	7.78673	41.5507	0.624718	0.086	6.85759	239.036	16.5859	153.308	0.946446	1197.6	153.269	153.308	0.946446	0.128013
19KM1 17	600.454	1.85787	0.190298	4.75979	41.1996	0.573668	0.0594354	2.79972	176.884	7.7269	154.599	0.876335	487.177	104.354	154.599	0.876335	0.317337
19KM1 2	603.432	1.32639	0.20201	3.7587	41.0853	0.595397	0.062882	3.03863	186.826	6.41414	155.024	0.911999	611.499	80.201	155.024	0.911999	0.253515
19KM1 18	703.837	1.65126	0.188281	3.7362	40.9508	0.837213	0.0582285	2.30894	175.162	6.01109	155.527	1.28651	450.146	80.9199	155.527	1.28651	0.345504
19KM1 21	811.51	1.7414	0.195566	2.83988	40.4006	0.597528	0.0591904	2.16812	181.368	4.71687	157.619	0.930399	504.168	61.1035	157.619	0.930399	0.312633
19KM1 5	220.986	2.81106	0.272096	8.55942	40.2664	0.621195	0.0873085	5.95903	244.368	18.5919	158.139	0.970397	1184.56	168.968	158.139	0.970397	0.1335
19KM1 35	1010.58	2.0046	0.193685	2.29713	40.1635	0.61331	0.0578295	1.86503	179.769	3.78463	158.539	0.960476	469.84	49.0076	158.539	0.960476	0.337432
19KM1 6	350.423	2.72454	0.230258	4.83814	40.1217	0.628138	0.0713119	4.28358	210.412	9.19473	158.702	0.984694	838.75	99.9697	158.702	0.984694	0.189212
19KM1 22	316.483	2.13239	0.236609	7.90496	39.5175	0.498566	0.0731879	5.32824	215.64	15.359	161.098	0.793227	863.801	163.873	161.098	0.793227	0.186499
19KM1 10	463.39	1.72633	0.215036	4.47555	38.8794	0.51112	0.0645822	3.25261	197.77	8.0428	163.709	0.826214	627.257	95.8495	163.709	0.826214	0.260992
19KM1 4	154.228	2.82292	0.326297	11.2695	38.7624	0.502	0.102294	8.40405	286.735	28.159	164.197	0.813859	1462.66	214.593	164.197	0.813859	0.112259
19KM1 26	372.439	2.25853	0.245771	4.65461	38.707	0.587056	0.0733466	3.92972	223.135	9.32432	164.429	0.953084	899.472	95.3055	164.429	0.953084	0.182806
19KM1 25	502.719	2.2448	0.226227	4.11106	38.3151	0.621656	0.065816	3.08479	207.079	7.70131	166.089	1.01932	704.631	86.5058	166.089	1.01932	0.235711
19KM1 39	321.194	2.16633	0.256035	6.61824	38.2289	0.549355	0.0760518	4.70871	231.467	13.6993	166.459	0.902745	957.963	134.938	166.459	0.902745	0.173764
19KM1 36	371.415	1.80017	0.25673	4.61728	37.8526	0.57981	0.0744854	3.8849	232.029	9.57776	168.092	0.962019	943.27	93.8722	168.092	0.962019	0.178202
19KM1 30	595.299	1.81515	0.227881	3.92383	37.3133	0.736699	0.0642055	2.7323	208.448	7.39434	170.49	1.23953	663.579	82.5829	170.49	1.23953	0.256925
19KM1 43	115.143	1.84545	0.310823	10.4338	37.0733	0.594817	0.0967526	8.41872	274.819	25.1265	171.579	1.00712	1283.49	203.435	171.579	1.00712	0.133682
19KM1 12	993.516	1.55162	0.20966	2.25247	34.9967	0.806374	0.0547817	1.86828	193.267	3.96408	181.618	1.44408	338.974	47.6164	181.618	1.44408	0.535787
19KM1 19	4519.45	2.38006	0.198435	1.14865	34.958	0.616214	0.0505102	0.809664	183.801	1.93117	181.816	1.10472	210.413	22.4684	181.816	1.10472	0.864091
19KM1 7	123.314	1.78141	0.419376	9.88273	24.8741	0.613757	0.0823722	5.6103	355.605	29.6576	254.088	1.52915	1086.88	198.162	254.088	1.52915	0.233777
19KM1 23	1056.63	2.25188	0.509365	1.37225	15.1924	0.569602	0.0566667	1.03403	418.022	4.7022	410.937	2.26766	458.253	27.6986	410.937	2.26766	0.896747
19KM1 41	183.51	1.23726	0.612218	4.67926	14.9254	0.90667	0.0693757	3.65753	484.958	18.0441	418.056	3.6701	815.909	95.9897	418.056	3.6701	0.512381
19KM1 27	454.912	2.75544	1.67569	0.970491	6.02793	0.507239	0.07382	0.784257	999.347	6.17141	989.45	4.65268	1021.99	16.7472	1021.99	16.7472	0.968163
19KM1 38	289.029	2.22122	1.78634	1.45719	5.66018	0.730528	0.073885	1.18968	1040.49	9.48609	1048.77	7.07082	1024	25.5321	1024	25.5321	1.02419
19KM1 29	1176.9	11.5928	1.64709	0.955323	6.27857	0.653826	0.0751146	0.661648	988.436	6.03579	952.729	5.79074	1069.47	13.9787	1069.47	13.9787	0.890845
19KM1 20	643.142	1.21879	1.80605	1.22389	5.72921	0.783912	0.075195	0.893205	1047.65	7.9986	1037.1	7.50968	1070.61	18.8754	1070.61	18.8754	0.968702
19KM1 32	389.29	2.25701	1.9955	1.08651	5.36647	0.474967	0.0781181	0.758017	1113.99	7.34945	1101.53	4.80932	1139.25	19.4173	1139.25	19.4173	0.966893
19KM1 8	335.43	1.89814	3.03822	1.09004	4.15262	0.661233	0.0925115	0.823278	1417.28	8.32746	1390.92	8.27267	1457.92	16.4781	1457.92	16.4781	0.954043
19KM1 24	1422.4	2.46182	4.02978	0.658244	3.50339	0.441393	0.102647	0.466857	1640.23	5.35493	1618.69	6.31835	1668.73	9.03054	1668.73	9.03054	0.970011
19KM1 14	170.82	2.33468	4.15133	1.47856	3.44495	0.884942	0.104897	1.07566	1664.47	12.0992	1642.93	12.8341	1692.54	21.8415	1692.54	21.8415	0.970688
19KM1 31	210.117	3.77522	4.43925	0.939555	3.32847	0.55822	0.107584	0.738294	1719.7	7.78631	1693.48	8.31362	1752.53	13.8302	1752.53	13.8302	0.966306
19KM1 13	317.75	2.64442	4.46673	0.919394	3.31588	0.594833	0.108187	0.687913	1724.81	7.62784	1699.13	8.88472	1756.89	12.8238	1756.89	12.8238	0.967124
19KM1 42	498.636	2.47508	4.66538	0.926459	3.25084	0.630121	0.110362	0.655298	1761.05	7.7468	1728.95	9.55582	1800.13	12.3575	1800.13	12.3575	0.960459
19KM1 45	274.917	1.81644	5.482	0.726351	2.97927	0.448773	0.119128	0.541737	1897.78	6.23752	1865.72	7.27012	1933.79	10.2237	1933.79	10.2237	0.964802
19KM1 15	137.83	1.68065	6.24274	0.999196	2.77518	0.494205	0.126669	0.783503	2010.46	8.74508	1983.77	8.43894	2038.74	15.3577	2038.74	15.3577	0.973037
19KM1 40	458.112	4.46225	9.36706	0.899343	2.37178	0.622112	0.161502	0.647735	2374.61	8.25112	2267.85	11.894	2468.27	10.9659	2468.27	10.9659	0.918801
19KM1 33	127.422	1.51056	11.1538	1.10731	2.09389	0.720715	0.169932	0.810158	2536.06	10.3187	2516.72	15.0168	2552.29	14.077	2552.29	14.077	0.986063
19KM1 44	336.527	2.14748	14.4963	1.07155	1.76575	0.726719	0.186606	0.756709	2782.76	10.1785	2892.75	16.9384	2704.66	12.9983	2704.66	12.9983	1.06954
19KM1 28	179.875	0.936336	16.7122	0.872361	1.80963	0.593371	0.219738	0.63678	2918.47	8.3579	2835.97	13.6143	2976.56	10.3014	2976.56	10.3014	0.952766
* Radiogenic
† Analyses with greater than 10% uncertainty in 207/206 age (1-sigma) or 5% uncertainty in 206/238 age (1-sigma) are excluded. Ages >600 Ma with >20% discordance and/or 5% reverse discordance are excluded. Accepted ages calculated using 206Pb/238U ages for grains younger than 900 Ma and 207Pb/206Pb ages for grains older than 900 Ma.
§ Calculated based on 206Pb/238U age vs. 207Pb/206Pb age.
Decay constants used in age calculations: λ238U = 1.55125 x 10^-10, λ235U= 9.8485x10^-10 (Jaffey et al., 1971); 238U/235U = 137.88 (Chen and Wasserberg, 1981). Common Pb correction from measured 206Pb/204Pb, with initial Pb composition from Stacey and Kramers (1975).
REFERNCES CITED
Chen and Wasserberg, 1981
Jaffey et al., 1971
Stacey, J.S., and Kramers, J.D., 1975, Approximation of terrestrial lead isotope evolution by a two-stage model: Earth and Planetary Science Letters, v. 26, p. 207–221, https://doi.org/10.1016/0012-821X(75)90088-6.
Vermeesch, P., 2018a, IsoplotR: a free and open toolbox for geochronology: Geoscience Frontiers, v. 9, p. 1479–1493, https://doi.org/10.1016/j.gsf.2018.04.001.
Wiedenbeck, M., Allé, P., Corfu, F., Griffin, W.L., Meier, M., Oberli, F., Quadt, A.V., Roddick, J.C., and Spiegel, W., 1995, Three natural zircon standards for U-Th-Pb, Lu-Hf, trace element and REE analyses: Geostandards and Geoanalytical Research, v. 19, no. 1, p. 1–23, doi: 10.1111/j.1751-908X.1995.tb00147.x.
